# Supplementary material
Source: PubMed Central journal article supplement (PMC3289759)
Supplement: NIHMS348311-supplement-01.pdf [file NIHMS348311-supplement-01.pdf]

**Adaptation to Life Events: Supplementary material**

The supplementary material comprises tables and an additional reference list of all scales cited in these tables.

Table 1 contains the meta-analytic model results for the comparison between AWB and CWB.

Table 2 contains the moderator analyses for age.

Table 3 contains the moderator analyses for gender.

Table 4 contains the moderator analyses for reversed status.

Table 5 contains a list of abbreviations for commonly used scales.

Table 6 and Table 7 contain the effect sizes for the prospective and post-hoc studies on marriage, respectively.

Table 8 and Table 9 contain the effect sizes for the prospective and post-hoc studies on divorce, respectively.

Table 10 and Table 11 contain the effect sizes for the prospective and post-hoc studies on bereavement, respectively.

Table 12 and Table 13 contain the effect sizes for the prospective and post-hoc studies on child birth, respectively.

Table 14 and Table 15 contain the effect sizes for the prospective and post-hoc studies on unemployment, respectively.

Table 16 and Table 17 contain the effect sizes for the prospective and post-hoc studies on reemployment, respectively.

Table 18 and Table 19 contain the effect sizes for the prospective and post-hoc studies on retirement, respectively.

Table 20 and Table 21 contain the effect sizes for the prospective and post-hoc studies on relocation/migration, respectively.

Figure 1 shows the adaptation curves of all events for cognitive well-being.

Figure 2 shows the adaptation curves of all events for affective well-being.

Table 1. Meta-analytic results for the AWB vs. CWB models.

| Predictor                 | Reduced model prospective |                  | Full model prospective |                  | Reduced model post-hoc |                  | Full model post-hoc |                  |
|---------------------------|---------------------------|------------------|------------------------|------------------|------------------------|------------------|---------------------|------------------|
|                           | Estimate                  | 95 % CI          | Estimate               | 95 % CI          | Estimate               | 95 % CI          | Estimate            | 95 % CI          |
| <b>Marriage</b>           |                           |                  |                        |                  |                        |                  |                     |                  |
| Intercept $b_0$           | 0.31                      | [0.174, 0.447]   | 0.26                   | [0.167, 0.354]   | 0.25                   | [0.02, 0.471]    |                     |                  |
| Time $b_1$                | -0.12                     | [-0.156, -0.083] | -0.11                  | [-0.132, -0.08]  | -0.22                  | [-0.293, -0.155] |                     |                  |
| AWB $b_2$                 | 0.02                      | [-0.073, 0.114]  | -0.30                  | [-0.383, -0.219] |                        |                  |                     |                  |
| RS $b_{2a}$               | -0.47                     | [-0.568, -0.378] | -0.35                  | [-0.579, -0.129] |                        |                  |                     |                  |
| AWB $\times$ Time $b_3$   |                           |                  | 0.12                   | [0.086, 0.146]   |                        |                  |                     |                  |
| RS $\times$ Time $b_{3a}$ |                           |                  | -0.04                  | [-0.106, 0.032]  |                        |                  |                     |                  |
| Time lag $b_{99}$         | -0.01                     | [-0.021, -0.007] | -0.01                  | [-0.021, -0.007] | 0.02                   | [0.003, 0.043]   |                     |                  |
| <b>Divorce</b>            |                           |                  |                        |                  |                        |                  |                     |                  |
| Intercept $b_0$           | -0.07                     | [-0.133, -0.007] |                        |                  |                        |                  |                     |                  |
| Time $b_1$                | 0.07                      | [0.048, 0.084]   |                        |                  |                        |                  |                     |                  |
| Time lag $b_{99}$         | 0.00                      | [0.002, 0.007]   |                        |                  |                        |                  |                     |                  |
| <b>Bereavement</b>        |                           |                  |                        |                  |                        |                  |                     |                  |
| Intercept $b_0$           | -0.48                     | [-0.684, -0.274] | -0.39                  | [-0.583, -0.19]  | -0.20                  | [-0.338, -0.063] | -0.24               | [-0.394, -0.095] |
| Time $b_1$                | 0.16                      | [0.098, 0.213]   | 0.13                   | [0.093, 0.17]    | 0.13                   | [0.072, 0.188]   | 0.15                | [0.051, 0.248]   |
| AWB $b_2$                 | 0.36                      | [0.189, 0.537]   | 0.23                   | [-0.057, 0.523]  | 0.22                   | [0.038, 0.393]   | 0.28                | [0.02, 0.541]    |
| AWB $\times$ Time $b_3$   |                           |                  | 0.05                   | [-0.062, 0.17]   |                        |                  | -0.03               | [-0.144, 0.086]  |
| Time lag $b_{99}$         | 0.03                      | [0.012, 0.053]   | 0.04                   | [0.014, 0.057]   | -0.03                  | [-0.052, -0.001] | -0.03               | [-0.05, -0.001]  |
| <b>Child birth</b>        |                           |                  |                        |                  |                        |                  |                     |                  |
| Intercept $b_0$           | -0.19                     | [-0.375, -0.014] | 0.50                   | [0.166, 0.838]   | 0.03                   | [0.276, -0.215]  | 0.53                | [0.745, 0.308]   |
| Time $b_1$                | 0.01                      | [-0.033, 0.046]  | -0.19                  | [-0.273, -0.11]  | -0.04                  | [0.053, -0.132]  | -0.26               | [-0.125, -0.391] |
| AWB $b_2$                 | 0.32                      | [0.178, 0.469]   | -0.43                  | [-0.765, -0.087] | 0.21                   | [0.416, 0.003]   | -0.39               | [-0.112, -0.675] |
| RS $b_{2a}$               | -0.15                     | [-0.291, -0.003] | -0.56                  | [-0.877, -0.25]  |                        |                  |                     |                  |
| AWB $\times$ Time $b_3$   |                           |                  | 0.25                   | [0.151, 0.342]   |                        |                  | 0.26                | [0.405, 0.121]   |
| RS $\times$ Time $b_{3a}$ |                           |                  | 0.00                   | [-0.003, 0.012]  |                        |                  |                     |                  |
| Time lag $b_{99}$         | 0.00                      | [-0.009, 0.016]  | 0.01                   | [-0.006, 0.017]  | -0.03                  | [0.012, -0.08]   | -0.02               | [0.024, -0.069]  |

| Predictor                   | Reduced model prospective |                  | Full model prospective |                  | Reduced model post-hoc |                  | Full model post-hoc |                  |
|-----------------------------|---------------------------|------------------|------------------------|------------------|------------------------|------------------|---------------------|------------------|
|                             | Estimate                  | 95 % CI          | Estimate               | 95 % CI          | Estimate               | 95 % CI          | Estimate            | 95 % CI          |
| <b>Unemployment</b>         |                           |                  |                        |                  |                        |                  |                     |                  |
| Intercept $b_0$             | -0.22                     | [-0.552, 0.113]  | -0.43                  | [-0.478, -0.377] |                        |                  |                     |                  |
| Time $b_1$                  | 0.06                      | [-0.026, 0.147]  | 0.12                   | [0.104, 0.126]   |                        |                  |                     |                  |
| AWB $b_2$                   | -0.10                     | [-0.279, 0.083]  | 0.18                   | [-0.079, 0.447]  |                        |                  |                     |                  |
| AWB $\times$ Time $b_3$     |                           |                  | -0.11                  | [-0.197, -0.013] |                        |                  |                     |                  |
| Time lag $b_{99}$           | 0.00                      | [-0.013, 0.007]  | -0.01                  | [-0.014, -0.003] |                        |                  |                     |                  |
| <b>Reemployment</b>         |                           |                  |                        |                  |                        |                  |                     |                  |
| Intercept $b_0$             | -0.19                     | [-0.22, -0.149]  | -0.21                  | [-0.218, -0.193] |                        |                  |                     |                  |
| Time $b_1$                  | 0.07                      | [0.034, 0.099]   | 0.09                   | [0.082, 0.098]   |                        |                  |                     |                  |
| AWB $b_2$                   | 0.24                      | [0.114, 0.368]   | 0.28                   | [0.116, 0.449]   |                        |                  |                     |                  |
| AWB $\times$ Time $b_3$     |                           |                  | -0.05                  | [-0.096, -0.004] |                        |                  |                     |                  |
| Time lag $b_{99}$           | -0.01                     | [-0.021, 0.008]  | -0.01                  | [-0.025, 0.004]  |                        |                  |                     |                  |
| <b>Retirement</b>           |                           |                  |                        |                  |                        |                  |                     |                  |
| Intercept $b_0$             | -0.29                     | [-0.536, -0.035] | -0.21                  | [-0.444, 0.015]  |                        |                  |                     |                  |
| Time $b_1$                  | 0.07                      | [0.008, 0.127]   | 0.04                   | [-0.013, 0.099]  |                        |                  |                     |                  |
| AWB $b_2$                   | 0.24                      | [0.06, 0.414]    | 0.07                   | [-0.347, 0.49]   |                        |                  |                     |                  |
| AWB $\times$ Time $b_3$     |                           |                  | 0.06                   | [-0.062, 0.175]  |                        |                  |                     |                  |
| Time lag $b_{99}$           | -0.01                     | [-0.027, 0.007]  | -0.01                  | [-0.027, 0.007]  |                        |                  |                     |                  |
| <b>Relocation/migration</b> |                           |                  |                        |                  |                        |                  |                     |                  |
| Intercept $b_0$             | 0.50                      | [-4.349, 5.351]  |                        |                  | -0.20                  | [-0.063, -0.338] | -0.24               | [-0.095, -0.394] |
| Time $b_1$                  | 0.07                      | [-0.328, 0.474]  |                        |                  | 0.13                   | [0.188, 0.072]   | 0.15                | [0.248, 0.051]   |
| AWB $b_2$                   | -0.27                     | [-3.71, 3.167]   |                        |                  | 0.22                   | [0.393, 0.038]   | 0.28                | [0.541, 0.02]    |
| AWB $\times$ Time $b_3$     |                           |                  |                        |                  |                        |                  | -0.03               | [0.086, -0.144]  |
| Time lag $b_{99}$           | 0.02                      | [-0.088, 0.118]  |                        |                  | -0.03                  | [-0.001, -0.052] | -0.03               | [-0.001, -0.05]  |

Notes. Time = log-transformed time since the event in months, AWB = Affective well-being, CWB = Cognitive well-being, LS = life satisfaction, RS = relationship satisfaction, Time lag = Time between the event and the baseline assessment in months.

Table 2. Moderator analyses for age and age<sup>2</sup>.

| Predictor                     | Reduced model prospective |                  | Full model prospective |                 | Reduced model post-hoc |                  | Full model post-hoc |                  |
|-------------------------------|---------------------------|------------------|------------------------|-----------------|------------------------|------------------|---------------------|------------------|
|                               | Estimate                  | 95 % CI          | Estimate               | 95 % CI         | Estimate               | 95 % CI          | Estimate            | 95 % CI          |
| <b>Marriage</b>               |                           |                  |                        |                 |                        |                  |                     |                  |
| Intercept $b_0$               | -0.06                     | [-0.271, 0.157]  | -0.15                  | [-0.509, 0.201] | 0.35                   | [0.158, 0.542]   | 0.42                | [0.194, 0.636]   |
| Time $b_1$                    | -0.12                     | [-0.188, -0.046] | -0.09                  | [-0.202, 0.026] | -0.25                  | [-0.311, -0.188] | -0.27               | [-0.339, -0.199] |
| Age $b_4$                     | 0.03                      | [0.006, 0.055]   | 0.00                   | [-0.045, 0.05]  | 0.03                   | [0.012, 0.056]   | 0.06                | [-0.006, 0.126]  |
| Age <sup>2</sup> $b_5$        | 0.00                      | [-0.005, 0.013]  | 0.02                   | [-0.004, 0.033] | 0.00                   | [-0.003, 0.004]  | -0.01               | [-0.023, 0.005]  |
| Age × Time $b_6$              |                           |                  | 0.01                   | [-0.008, 0.024] |                        |                  | -0.01               | [-0.03, 0.014]   |
| Age <sup>2</sup> × Time $b_7$ |                           |                  | 0.00                   | [-0.01, 0.003]  |                        |                  | 0.00                | [-0.002, 0.007]  |
| Time lag $b_{99}$             | -0.02                     | [-0.057, 0.018]  | -0.02                  | [-0.057, 0.016] | 0.02                   | [0.005, 0.027]   | 0.02                | [0.005, 0.028]   |
| <b>Bereavement</b>            |                           |                  |                        |                 |                        |                  |                     |                  |
| Intercept $b_0$               | -0.24                     | [-0.642, 0.154]  | -0.12                  | [-0.674, 0.442] | -0.02                  | [-0.196, 0.148]  | -0.03               | [-0.275, 0.207]  |
| Time $b_1$                    | 0.11                      | [0.032, 0.196]   | 0.07                   | [-0.043, 0.183] | 0.13                   | [0.054, 0.204]   | 0.13                | [0.035, 0.233]   |
| Age $b_4$                     | -0.02                     | [-0.027, -0.003] | -0.01                  | [-0.034, 0.017] | 0.00                   | [-0.008, 0.006]  | 0.00                | [-0.009, 0.017]  |
| Age <sup>2</sup> $b_5$        | 0.00                      | [-0.002, 0]      | 0.00                   | [-0.003, 0.001] | 0.00                   | [-0.001, 0]      | 0.00                | [-0.002, 0.001]  |
| Age × Time $b_6$              |                           |                  | 0.00                   | [-0.011, 0.002] |                        |                  | 0.00                | [-0.007, 0.002]  |
| Age <sup>2</sup> × Time $b_7$ |                           |                  | 0.00                   | [0, 0.001]      |                        |                  | 0.00                | [0, 0]           |
| Time lag $b_{99}$             | -0.01                     | [-0.049, 0.033]  | -0.01                  | [-0.048, 0.031] | -0.02                  | [-0.039, 0.009]  | -0.02               | [-0.038, 0.007]  |
| <b>Child birth</b>            |                           |                  |                        |                 |                        |                  |                     |                  |
| Intercept $b_0$               | 0.11                      | [-0.027, 0.25]   | 0.08                   | [-0.061, 0.224] | 0.27                   | [0.475, 0.063]   | 0.15                | [0.429, -0.136]  |
| Time $b_1$                    | -0.05                     | [-0.106, -0.002] | -0.04                  | [-0.095, 0.018] | -0.08                  | [0.018, -0.185]  | -0.04               | [0.078, -0.161]  |
| Age $b_4$                     | 0.01                      | [-0.014, 0.04]   | 0.04                   | [0.007, 0.077]  | 0.01                   | [0.05, -0.036]   | 0.02                | [0.091, -0.048]  |
| Age <sup>2</sup> $b_5$        | 0.00                      | [-0.002, 0.004]  | 0.01                   | [0.001, 0.01]   | 0.00                   | [0.005, -0.002]  | 0.05                | [0.102, -0.008]  |
| Age × Time $b_6$              |                           |                  | -0.02                  | [-0.044, 0.003] |                        |                  | -0.01               | [0.029, -0.057]  |
| Age <sup>2</sup> × Time $b_7$ |                           |                  | 0.00                   | [-0.005, 0]     |                        |                  | -0.02               | [0.004, -0.041]  |
| Time lag $b_{99}$             | 0.03                      | [-0.008, 0.073]  | 0.03                   | [-0.012, 0.069] | -0.04                  | [-0.008, -0.074] | -0.03               | [-0.001, -0.056] |

| Predictor                            | Reduced model prospective |                  | Full model prospective |                  | Reduced model post-hoc |         | Full model post-hoc |         |
|--------------------------------------|---------------------------|------------------|------------------------|------------------|------------------------|---------|---------------------|---------|
|                                      | Estimate                  | 95 % CI          | Estimate               | 95 % CI          | Estimate               | 95 % CI | Estimate            | 95 % CI |
| <b>Unemployment</b>                  |                           |                  |                        |                  |                        |         |                     |         |
| Intercept $b_0$                      | 0.50                      | [-0.043, 1.044]  | 0.47                   | [-0.596, 1.537]  |                        |         |                     |         |
| Time $b_1$                           | -0.08                     | [-0.122, -0.044] | -0.05                  | [-0.648, 0.554]  |                        |         |                     |         |
| Age $b_4$                            | 0.03                      | [0.015, 0.043]   | 0.01                   | [-0.049, 0.065]  |                        |         |                     |         |
| Age <sup>2</sup> $b_5$               | 0.00                      | [-0.001, 0]      | 0.00                   | [-0.003, 0.004]  |                        |         |                     |         |
| Age $\times$ Time $b_6$              |                           |                  | 0.01                   | [-0.016, 0.039]  |                        |         |                     |         |
| Age <sup>2</sup> $\times$ Time $b_7$ |                           |                  | 0.00                   | [-0.002, 0.001]  |                        |         |                     |         |
| Time lag $b_{99}$                    | 0.05                      | [0.006, 0.102]   | 0.06                   | [0.003, 0.116]   |                        |         |                     |         |
| <b>Reemployment</b>                  |                           |                  |                        |                  |                        |         |                     |         |
| Intercept $b_0$                      | -0.39                     | [-0.983, 0.212]  | -2.71                  | [-3.06, -2.366]  |                        |         |                     |         |
| Time $b_1$                           | 0.06                      | [0.013, 0.101]   | 1.25                   | [1.068, 1.425]   |                        |         |                     |         |
| Age $b_4$                            | 0.06                      | [-0.059, 0.171]  | 0.50                   | [0.424, 0.571]   |                        |         |                     |         |
| Age <sup>2</sup> $b_5$               | 0.01                      | [-0.004, 0.018]  | 0.05                   | [0.044, 0.057]   |                        |         |                     |         |
| Age $\times$ Time $b_6$              |                           |                  | -0.23                  | [-0.264, -0.187] |                        |         |                     |         |
| Age <sup>2</sup> $\times$ Time $b_7$ |                           |                  | -0.02                  | [-0.026, -0.019] |                        |         |                     |         |
| Time lag $b_{99}$                    | -0.02                     | [-0.035, 0.005]  | 0.00                   | [-0.006, 0.009]  |                        |         |                     |         |
| <b>Retirement</b>                    |                           |                  |                        |                  |                        |         |                     |         |
| Intercept $b_0$                      | -0.26                     | [-0.506, -0.016] | -0.13                  | [-0.401, 0.144]  |                        |         |                     |         |
| Time $b_1$                           | 0.04                      | [-0.013, 0.099]  | 0.00                   | [-0.052, 0.059]  |                        |         |                     |         |
| Age $b_4$                            | -0.03                     | [-0.079, 0.025]  | -0.13                  | [-0.419, 0.166]  |                        |         |                     |         |
| Age <sup>2</sup> $b_5$               | 0.01                      | [0.002, 0.015]   | -0.06                  | [-0.138, 0.023]  |                        |         |                     |         |
| Age $\times$ Time $b_6$              |                           |                  | 0.04                   | [-0.057, 0.144]  |                        |         |                     |         |
| Age <sup>2</sup> $\times$ Time $b_7$ |                           |                  | 0.03                   | [-0.006, 0.058]  |                        |         |                     |         |
| Time lag $b_{99}$                    | -0.02                     | [-0.035, -0.012] | -0.02                  | [-0.037, -0.001] |                        |         |                     |         |

*Notes.* Time = log-transformed time since the event in months, Age = centered mean age of the sample, Age2 = squared mean age of the sample, Time lag = Time between the event and the baseline assessment in months.

Table 3. Moderator analyses for percentage of males.

| Predictor                | Reduced model prospective |                 | Full model prospective |                  | Reduced model post-hoc |                  | Full model post-hoc |                  |
|--------------------------|---------------------------|-----------------|------------------------|------------------|------------------------|------------------|---------------------|------------------|
|                          | Estimate                  | 95 % CI         | Estimate               | 95 % CI          | Estimate               | 95 % CI          | Estimate            | 95 % CI          |
| <b>Marriage</b>          |                           |                 |                        |                  |                        |                  |                     |                  |
| Intercept $b_0$          | -0.10                     | [-0.319, 0.125] | -0.10                  | [-0.32, 0.126]   | 0.25                   | [0.017, 0.474]   | 0.25                | [0.029, 0.462]   |
| Time $b_1$               | -0.11                     | [-0.188, -0.04] | -0.11                  | [-0.188, -0.039] | -0.22                  | [-0.293, -0.154] | -0.22               | [-0.289, -0.158] |
| Male $b_8$               | 0.03                      | [-0.169, 0.221] | 0.01                   | [-0.564, 0.587]  | 0.00                   | [-0.142, 0.134]  | -0.15               | [-0.616, 0.32]   |
| Male $\times$ Time $b_9$ |                           |                 | 0.01                   | [-0.171, 0.18]   |                        |                  | 0.04                | [-0.101, 0.187]  |
| Time lag $b_{99}$        | -0.04                     | [-0.057, -0.02] | -0.04                  | [-0.057, -0.02]  | 0.02                   | [0.003, 0.043]   | 0.02                | [0.003, 0.043]   |
| <b>Bereavement</b>       |                           |                 |                        |                  |                        |                  |                     |                  |
| Intercept $b_0$          | -0.02                     | [-0.444, 0.408] | -0.05                  | [-0.495, 0.399]  | -0.07                  | [-0.321, 0.174]  | -0.07               | [-0.316, 0.171]  |
| Time $b_1$               | 0.04                      | [-0.016, 0.088] | 0.05                   | [-0.008, 0.105]  | 0.15                   | [0.08, 0.224]    | 0.15                | [0.076, 0.226]   |
| Male $b_8$               | -0.13                     | [-0.66, 0.4]    | 1.24                   | [-0.237, 2.722]  | -0.14                  | [-0.385, 0.099]  | -0.35               | [-1.21, 0.505]   |
| Male $\times$ Time $b_9$ |                           |                 | -0.49                  | [-0.922, -0.06]  |                        |                  | 0.08                | [-0.175, 0.331]  |
| Time lag $b_{99}$        | 0.02                      | [-0.026, 0.07]  | 0.02                   | [-0.026, 0.07]   | -0.02                  | [-0.039, 0.000]  | -0.02               | [-0.039, 0.000]  |
| <b>Child birth</b>       |                           |                 |                        |                  |                        |                  |                     |                  |
| Intercept $b_0$          | 0.02                      | [-0.069, 0.113] | 0.03                   | [-0.06, 0.116]   | 0.21                   | [0.401, 0.027]   | 0.26                | [0.412, 0.108]   |
| Time $b_1$               | -0.04                     | [-0.088, 0.009] | -0.04                  | [-0.087, 0.007]  | -0.03                  | [0.059, -0.125]  | -0.05               | [0.025, -0.131]  |
| Male $b_8$               | 0.00                      | [-0.112, 0.118] | 0.12                   | [-0.038, 0.278]  | -0.10                  | [0.095, -0.287]  | 0.65                | [0.983, 0.321]   |
| Male $\times$ Time $b_9$ |                           |                 | -0.08                  | [-0.18, 0.018]   |                        |                  | -0.33               | [-0.173, -0.493] |
| Time lag $b_{99}$        | 0.00                      | [-0.016, 0.022] | 0.00                   | [-0.014, 0.022]  | -0.05                  | [-0.01, -0.094]  | -0.04               | [-0.008, -0.079] |
| <b>Unemployment</b>      |                           |                 |                        |                  |                        |                  |                     |                  |
| Intercept $b_0$          | -0.26                     | [-0.596, 0.085] | -0.23                  | [-0.642, 0.179]  |                        |                  |                     |                  |
| Time $b_1$               | 0.08                      | [-0.017, 0.166] | 0.08                   | [-0.013, 0.166]  |                        |                  |                     |                  |
| Male $b_8$               | -0.19                     | [-0.444, 0.064] | 0.23                   | [-0.883, 1.348]  |                        |                  |                     |                  |
| Male $\times$ Time $b_9$ |                           |                 | -0.20                  | [-0.678, 0.274]  |                        |                  |                     |                  |
| Time lag $b_{99}$        | 0.00                      | [-0.004, 0.007] | 0.01                   | [-0.007, 0.019]  |                        |                  |                     |                  |

| Predictor                | Reduced model prospective |                  | Full model prospective |         | Reduced model post-hoc |         | Full model post-hoc |         |
|--------------------------|---------------------------|------------------|------------------------|---------|------------------------|---------|---------------------|---------|
|                          | Estimate                  | 95 % CI          | Estimate               | 95 % CI | Estimate               | 95 % CI | Estimate            | 95 % CI |
| <b>Reemployment</b>      |                           |                  |                        |         |                        |         |                     |         |
| Intercept $b_0$          | 0.05                      | [-0.04, 0.13]    |                        |         |                        |         |                     |         |
| Time $b_1$               | 0.07                      | [0.055, 0.081]   |                        |         |                        |         |                     |         |
| Male $b_8$               | 0.63                      | [0.285, 0.964]   |                        |         |                        |         |                     |         |
| Male $\times$ Time $b_9$ |                           |                  |                        |         |                        |         |                     |         |
| Time lag $b_{99}$        | 0.01                      | [-0.003, 0.027]  |                        |         |                        |         |                     |         |
| <b>Retirement</b>        |                           |                  |                        |         |                        |         |                     |         |
| Intercept $b_0$          | -0.45                     | [-0.737, -0.161] |                        |         |                        |         |                     |         |
| Time $b_1$               | 0.12                      | [0.005, 0.242]   |                        |         |                        |         |                     |         |
| Male $b_8$               | 0.21                      | [-0.275, 0.691]  |                        |         |                        |         |                     |         |
| Male $\times$ Time $b_9$ |                           |                  |                        |         |                        |         |                     |         |
| Time lag $b_{99}$        | -0.03                     | [-0.049, -0.002] |                        |         |                        |         |                     |         |

*Notes.* Time = log-transformed time since the event in months, Male = centered percentage of males in the sample, Time lag = Time between the event and the baseline assessment in months.

Table 4. Moderator analyses for status reversal.

| Predictor                               | Reduced model prospective |                  | Full model prospective |                  | Reduced model post-hoc |                  | Full model post-hoc |                  |
|-----------------------------------------|---------------------------|------------------|------------------------|------------------|------------------------|------------------|---------------------|------------------|
|                                         | Estimate                  | 95 % CI          | Estimate               | 95 % CI          | Estimate               | 95 % CI          | Estimate            | 95 % CI          |
| <b>Marriage</b>                         |                           |                  |                        |                  |                        |                  |                     |                  |
| Intercept $b_0$                         | -0.04                     | [-0.251, 0.172]  | 0.17                   | [-0.058, 0.394]  | -0.19                  | [-0.441, 0.071]  | 0.17                | [-0.058, 0.394]  |
| Time $b_1$                              | -0.07                     | [-0.136, 0.003]  | -0.20                  | [-0.269, -0.133] | -0.24                  | [-0.305, -0.165] | -0.20               | [-0.269, -0.133] |
| Status change $b_{10}$                  | -0.22                     | [-0.416, -0.019] | -0.04                  | [-0.371, 0.283]  | 0.51                   | [0.333, 0.694]   | -0.04               | [-0.371, 0.283]  |
| Status change $\times$ Time<br>$b_{11}$ |                           |                  | 0.11                   | [0.023, 0.186]   |                        |                  | 0.11                | [0.023, 0.186]   |
| Time lag $b_{99}$                       | -0.01                     | [-0.037, 0.019]  | -0.01                  | [-0.042, 0.028]  | 0.02                   | [-0.002, 0.036]  | -0.01               | [-0.042, 0.028]  |
| <b>Child birth</b>                      |                           |                  |                        |                  |                        |                  |                     |                  |
| Intercept $b_0$                         | 0.03                      | [-0.059, 0.127]  | 0.03                   | [-0.067, 0.12]   | 0.24                   | [0.444, 0.04]    | 0.18                | [0.4, -0.041]    |
| Time $b_1$                              | -0.02                     | [-0.063, 0.017]  | -0.02                  | [-0.059, 0.029]  | -0.04                  | [0.056, -0.139]  | -0.01               | [0.101, -0.122]  |
| Status change $b_{10}$                  | -0.16                     | [-0.347, 0.031]  | 0.02                   | [-0.182, 0.214]  | 0.03                   | [0.22, -0.16]    | 0.46                | [0.91, 0.013]    |
| Status change $\times$ Time<br>$b_{11}$ |                           |                  | -0.07                  | [-0.153, 0.021]  |                        |                  | -0.16               | [0.004, -0.316]  |
| Time lag $b_{99}$                       | 0.01                      | [-0.012, 0.028]  | 0.01                   | [-0.012, 0.028]  | -0.06                  | [-0.025, -0.097] | -0.06               | [-0.023, -0.091] |
| <b>Unemployment</b>                     |                           |                  |                        |                  |                        |                  |                     |                  |
| Intercept $b_0$                         | -0.30                     | [-0.514, -0.076] | -0.35                  | [-0.442, -0.249] |                        |                  |                     |                  |
| Time $b_1$                              | 0.08                      | [0.016, 0.14]    | 0.09                   | [0.051, 0.124]   |                        |                  |                     |                  |
| Status change $b_{10}$                  | -0.03                     | [-0.273, 0.209]  | 0.25                   | [-0.805, 1.299]  |                        |                  |                     |                  |
| Status change $\times$ Time<br>$b_{11}$ |                           |                  | -0.14                  | [-0.673, 0.387]  |                        |                  |                     |                  |
| Time lag $b_{99}$                       | 0.00                      | [-0.014, 0.013]  | -0.01                  | [-0.025, 0.012]  |                        |                  |                     |                  |

Notes. Time = log-transformed time since the event in months, Status change = dummy variable indicating that this event was reversed for at least some people in the sample, Time lag = Time between the event and the baseline assessment in months.



*Table 5.* Abbreviations for the most common scales used in the meta-analysis.

| <b>Abbreviation</b> | <b>Name of Scale</b>                                | <b>Reference</b>                                   |
|---------------------|-----------------------------------------------------|----------------------------------------------------|
| ABS                 | Affect Balance                                      | Bradburn, 1969                                     |
| BSI                 | Brief Symptom Inventory                             | Derogatis, 1983                                    |
| CES-D               | Center for Epidemiological Studies Depression Index | Radloff, 1977                                      |
| DACL                | Depressive Adjective Checklist                      | Lubin, 1965                                        |
| DAS                 | Dyadic Adjustment Scale                             | Spanier, 1976                                      |
| EPDS                | Edinburgh Postnatal Depression Scale                | Cox, Holden & Sagovsky, 1987                       |
| GHQ                 | General Health Questionnaire                        | Goldberg, 1992                                     |
| GWB                 | General Well-Being Scale                            | Dupuy, 1973                                        |
| HADS                | Hospital anxiety and depression scale               | Zigmond & Snaith, 1983                             |
| HSC                 | Hopkins Symptoms Checklist                          | Derogatis, Lipman, Rickels, Uhlenhuth & Covi, 1974 |
| KMS                 | Kansas Marital Satisfaction Scale                   | Schumm, Paff-Bergen, Hatch & Obiorah, 1986         |
| MAT                 | Marital Adjustment Test                             | Locke & Wallace, 1959                              |
| MHI                 | Mental Health Inventory                             | Veit & Ware, 1983                                  |
| MOQ                 | Marital Opinion Questionnaire                       | Huston et al., 1986                                |
| PANAS               | Positive Affect Negative Affect Schedule            | Watson, Clark, & Tellegen, 1988                    |
| POMS                | Profile of mood states                              | McNair, Lorr, & Droppelman, 1971                   |
| QMI                 | Quality of Marriage Index                           | Norton, 1983                                       |
| SCL-90              | Symptom Checklist-90                                | Derogatis, 1977                                    |
| SF-36               | Short Form Health Survey (SF-36)                    | Ware & Sherbourne, 1992                            |
| SMD                 | Semantic Differential                               | Osgood, Suci, & Tannenbaum, 1957                   |
| SWLS                | Satisfaction With Life Scale                        | Diener, Emmons, Larsen, & Griffin, 1985            |

Table 6. Prospective effect sizes for marriage.

| <b>Publication</b>                     | <b>Group</b> | <b>AWB/CWB</b> | <b>Scale</b> | <b>Time lag</b> | <b>Months since event</b> | <b>N</b> | <b>d</b> |
|----------------------------------------|--------------|----------------|--------------|-----------------|---------------------------|----------|----------|
| Beach & O'Leary (1993)                 | husbands     | CWB            | MAT          | -1              | 6                         | 241      | -0.21    |
| Beach & O'Leary (1993)                 | husbands     | CWB            | MAT          | -1              | 18                        | 241      | -0.28    |
| Beach & O'Leary (1993)                 | wives        | CWB            | MAT          | -1              | 6                         | 241      | -0.17    |
| Beach & O'Leary (1993)                 | wives        | CWB            | MAT          | -1              | 18                        | 241      | -0.30    |
| Crowell, Treboux & Brockmeyer (2009)   |              | CWB            | DAS          | -3              | 72                        | 171      | -0.33    |
| Gordon (2006)                          | husbands     | CWB            | DAS          | -9              | 9                         | 86       | -0.39    |
| Gordon (2006)                          | husbands     | CWB            | DAS          | -9              | 21                        | 58       | -0.35    |
| Gordon (2006)                          | husbands     | CWB            | DAS          | -9              | 57                        | 34       | -0.41    |
| Gordon (2006)                          | wives        | CWB            | DAS          | -9              | 9                         | 70       | -0.36    |
| Gordon (2006)                          | wives        | CWB            | DAS          | -9              | 21                        | 59       | -0.49    |
| Gordon (2006)                          | wives        | CWB            | DAS          | -9              | 57                        | 31       | -0.69    |
| Homish, Leonard & Kearns-Bodkin (2006) | husbands     | AWB            | CES-D        | -1              | 12                        | 590      | 0.00     |
| Homish, Leonard & Kearns-Bodkin (2006) | husbands     | AWB            | CES-D        | -1              | 24                        | 590      | 0.01     |
| Homish, Leonard & Kearns-Bodkin (2006) | husbands     | CWB            | MAT          | -1              | 12                        | 538      | -0.45    |
| Homish, Leonard & Kearns-Bodkin (2006) | husbands     | CWB            | MAT          | -1              | 24                        | 487      | -0.58    |
| Homish, Leonard & Kearns-Bodkin (2006) | husbands     | CWB            | MAT          | -1              | 48                        | 425      | -0.57    |
| Homish, Leonard & Kearns-Bodkin (2006) | husbands     | CWB            | MAT          | -1              | 84                        | 384      | -0.63    |
| Homish, Leonard & Kearns-Bodkin (2006) | wives        | AWB            | CES-D        | -1              | 12                        | 590      | 0.05     |
| Homish, Leonard & Kearns-Bodkin (2006) | wives        | AWB            | CES-D        | -1              | 24                        | 590      | 0.07     |
| Homish, Leonard & Kearns-Bodkin (2006) | wives        | CWB            | MAT          | -1              | 12                        | 538      | -0.57    |
| Homish, Leonard & Kearns-Bodkin (2006) | wives        | CWB            | MAT          | -1              | 24                        | 487      | -0.76    |
| Homish, Leonard & Kearns-Bodkin (2006) | wives        | CWB            | MAT          | -1              | 48                        | 425      | -0.74    |
| Homish, Leonard & Kearns-Bodkin (2006) | wives        | CWB            | MAT          | -1              | 84                        | 384      | -0.86    |

| <b>Publication</b>                       | <b>Group</b> | <b>AWB/CWB</b> | <b>Scale</b>           | <b>Time lag</b> | <b>Months since event</b> | <b>N</b> | <b>d</b> |
|------------------------------------------|--------------|----------------|------------------------|-----------------|---------------------------|----------|----------|
| Lee & Gramotnev (2007)                   |              | AWB            | CES-D                  | -18             | 18                        | 2104     | 0.14     |
| Lee & Gramotnev (2007)                   |              | CWB            | Self-constructed scale | -18             | 18                        | 2104     | 0.45     |
| Lindahl, Clements & Markman (1998)       | females      | CWB            | MAT                    | -4.5            | 6                         | 36       | -0.11    |
| Lindahl, Clements & Markman (1998)       | females      | CWB            | MAT                    | -4.5            | 30.5                      | 36       | -0.44    |
| Lindahl, Clements & Markman (1998)       | females      | CWB            | MAT                    | -4.5            | 44.6                      | 36       | -0.61    |
| Lindahl, Clements & Markman (1998)       | females      | CWB            | MAT                    | -4.5            | 57.3                      | 36       | -0.34    |
| Lindahl, Clements & Markman (1998)       | females      | CWB            | MAT                    | -4.5            | 70                        | 36       | -0.51    |
| Lindahl, Clements & Markman (1998)       | females      | CWB            | MAT                    | -4.5            | 82.6                      | 36       | -0.44    |
| Lindahl, Clements & Markman (1998)       | females      | CWB            | MAT                    | -4.5            | 97                        | 36       | -0.52    |
| Lindahl, Clements & Markman (1998)       | males        | CWB            | MAT                    | -4.5            | 6                         | 36       | -0.23    |
| Lindahl, Clements & Markman (1998)       | males        | CWB            | MAT                    | -4.5            | 30.5                      | 36       | -0.75    |
| Lindahl, Clements & Markman (1998)       | males        | CWB            | MAT                    | -4.5            | 44.6                      | 36       | -0.65    |
| Lindahl, Clements & Markman (1998)       | males        | CWB            | MAT                    | -4.5            | 57.3                      | 36       | -0.69    |
| Lindahl, Clements & Markman (1998)       | males        | CWB            | MAT                    | -4.5            | 70                        | 36       | -0.74    |
| Lindahl, Clements & Markman (1998)       | males        | CWB            | MAT                    | -4.5            | 82.6                      | 36       | -0.55    |
| Lindahl, Clements & Markman (1998)       | males        | CWB            | MAT                    | -4.5            | 97                        | 36       | -0.45    |
| Lucas, Clark, Georgellis & Diener (2003) |              | CWB            | Single Item            | -0.5            | 6                         | 2221     | 0.09     |
| Lucas, Clark, Georgellis & Diener (2003) |              | CWB            | Single Item            | -0.5            | 18                        | 2030     | -0.01    |
| Lucas, Clark, Georgellis & Diener (2003) |              | CWB            | Single Item            | -0.5            | 30                        | 1761     | -0.11    |
| Lucas, Clark, Georgellis & Diener (2003) |              | CWB            | Single Item            | -0.5            | 42                        | 1516     | -0.06    |

| <b>Publication</b>                       | <b>Group</b> | <b>AWB/CWB</b> | <b>Scale</b> | <b>Time lag</b> | <b>Months since event</b> | <b>N</b> | <b>d</b> |
|------------------------------------------|--------------|----------------|--------------|-----------------|---------------------------|----------|----------|
| Lucas, Clark, Georgellis & Diener (2003) |              | CWB            | Single Item  | -0.5            | 54                        | 1366     | -0.08    |
| Lucas, Clark, Georgellis & Diener (2003) |              | CWB            | Single Item  | -0.5            | 66                        | 1196     | -0.13    |
| Lucas, Clark, Georgellis & Diener (2003) |              | CWB            | Single Item  | -0.5            | 78                        | 1068     | -0.15    |
| Lucas, Clark, Georgellis & Diener (2003) |              | CWB            | Single Item  | -0.5            | 90                        | 931      | -0.19    |
| Lucas, Clark, Georgellis & Diener (2003) |              | CWB            | Single Item  | -0.5            | 102                       | 782      | -0.21    |
| Schumacher & Leonard (2005)              | husbands     | CWB            | MAT          | -1              | 12                        | 592      | -0.46    |
| Schumacher & Leonard (2005)              | husbands     | CWB            | MAT          | -1              | 24                        | 592      | -0.59    |
| Schumacher & Leonard (2005)              | wives        | CWB            | MAT          | -1              | 12                        | 592      | -0.59    |
| Schumacher & Leonard (2005)              | wives        | CWB            | MAT          | -1              | 24                        | 592      | -0.78    |
| Smith, Vivian & O'Leary (1990)           |              | CWB            | MAT          | -1.5            | 6                         | 91       | -0.31    |
| Smith, Vivian & O'Leary (1990)           |              | CWB            | MAT          | -1.5            | 18                        | 91       | -0.46    |
| Smith, Vivian & O'Leary (1990)           |              | CWB            | MAT          | -1.5            | 30                        | 91       | -0.55    |
| Tucker & Aron (1993)                     | husbands     | CWB            | MOQ          | -1.9            | 8.3                       | 23       | -0.01    |
| Tucker & Aron (1993)                     | wives        | CWB            | MOQ          | -1.9            | 8.3                       | 23       | -0.24    |
| Yap, Anusic & Lucas (2010a)              |              | CWB            | Single Item  | -6              | 6                         | 1114     | 0.06     |
| Yap, Anusic & Lucas (2010a)              |              | CWB            | Single Item  | -6              | 18                        | 924      | -0.01    |
| Yap, Anusic & Lucas (2010a)              |              | CWB            | Single Item  | -6              | 30                        | 763      | -0.03    |
| Yap, Anusic & Lucas (2010a)              |              | CWB            | Single Item  | -6              | 42                        | 635      | -0.08    |
| Yap, Anusic & Lucas (2010a)              |              | CWB            | Single Item  | -6              | 54                        | 502      | -0.08    |
| Yap, Anusic & Lucas (2010a)              |              | CWB            | Single Item  | -6              | 66                        | 434      | -0.12    |
| Yap, Anusic & Lucas (2010a)              |              | CWB            | Single Item  | -6              | 78                        | 342      | -0.19    |

| <b>Publication</b>          | <b>Group</b> | <b>AWB/CWB</b> | <b>Scale</b> | <b>Time lag</b> | <b>Months since event</b> | <b><i>N</i></b> | <b><i>d</i></b> |
|-----------------------------|--------------|----------------|--------------|-----------------|---------------------------|-----------------|-----------------|
| Yap, Anusic & Lucas (2010a) |              | CWB            | Single Item  | -6              | 90                        | 258             | -0.18           |
| Yap, Anusic & Lucas (2010a) |              | CWB            | Single Item  | -6              | 102                       | 170             | -0.13           |
| Yap, Anusic & Lucas (2010b) |              | CWB            | Single Item  | -6              | 6                         | 297             | 0.03            |
| Yap, Anusic & Lucas (2010b) |              | CWB            | Single Item  | -6              | 18                        | 223             | 0.10            |
| Yap, Anusic & Lucas (2010b) |              | CWB            | Single Item  | -6              | 30                        | 198             | 0.04            |
| Yap, Anusic & Lucas (2010b) |              | CWB            | Single Item  | -6              | 42                        | 141             | -0.11           |
| Yap, Anusic & Lucas (2010b) |              | CWB            | Single Item  | -6              | 54                        | 102             | -0.12           |
| Yap, Anusic & Lucas (2010b) |              | CWB            | Single Item  | -6              | 66                        | 79              | -0.36           |
| Yap, Anusic & Lucas (2010b) |              | CWB            | Single Item  | -6              | 78                        | 60              | -0.35           |
| Yap, Anusic & Lucas (2010b) |              | CWB            | Single Item  | -6              | 90                        | 29              | -0.51           |

*Notes.* AWB = affective well-being. CWB = cognitive well-being. Time lag = time between baseline and event in months. *N* = sample size. *d* = bias-corrected standardized mean change. The abbreviations for the scales are listed in Table 5.

Table 7. Post-hoc effect sizes for marriage.

| Publication                                 | Group    | AWB/CWB | Scale | Time lag | Months since event | N   | d     |
|---------------------------------------------|----------|---------|-------|----------|--------------------|-----|-------|
| Brock & Lawrence (2008)                     | husbands | CWB     | QMI   | 4.5      | 13.5               | 101 | -0.52 |
| Brock & Lawrence (2008)                     | husbands | CWB     | QMI   | 4.5      | 22.5               | 101 | -0.44 |
| Brock & Lawrence (2008)                     | husbands | CWB     | QMI   | 4.5      | 31.5               | 101 | -0.33 |
| Brock & Lawrence (2008)                     | wives    | CWB     | QMI   | 4.5      | 13.5               | 101 | -0.36 |
| Brock & Lawrence (2008)                     | wives    | CWB     | QMI   | 4.5      | 22.5               | 101 | -0.33 |
| Brock & Lawrence (2008)                     | wives    | CWB     | QMI   | 4.5      | 31.5               | 101 | -0.15 |
| Dehle & Weiss (1998)                        |          | CWB     | DAS   | 19.6     | 22.6               | 94  | 0.00  |
| Halford, Lizzio, Wilson & Occhipinti (2007) | husbands | CWB     | DAS   | 2        | 14                 | 126 | -0.01 |
| Halford, Lizzio, Wilson & Occhipinti (2007) | husbands | CWB     | DAS   | 2        | 26                 | 126 | -0.20 |
| Halford, Lizzio, Wilson & Occhipinti (2007) | husbands | CWB     | DAS   | 2        | 38                 | 126 | -0.21 |
| Halford, Lizzio, Wilson & Occhipinti (2007) | husbands | CWB     | DAS   | 2        | 50                 | 126 | -0.18 |
| Halford, Lizzio, Wilson & Occhipinti (2007) | wives    | CWB     | DAS   | 2        | 14                 | 126 | -0.10 |
| Halford, Lizzio, Wilson & Occhipinti (2007) | wives    | CWB     | DAS   | 2        | 26                 | 126 | -0.26 |
| Halford, Lizzio, Wilson & Occhipinti (2007) | wives    | CWB     | DAS   | 2        | 38                 | 126 | -0.24 |
| Halford, Lizzio, Wilson & Occhipinti (2007) | wives    | CWB     | DAS   | 2        | 50                 | 126 | -0.24 |
| Houts (1998)                                | husbands | CWB     | MOQ   | 2        | 14                 | 118 | -0.75 |
| Houts (1998)                                | husbands | CWB     | MOQ   | 2        | 26                 | 118 | -1.23 |
| Houts (1998)                                | husbands | CWB     | MOQ   | 2        | 14                 | 118 | -0.66 |
| Houts (1998)                                | husbands | CWB     | MOQ   | 2        | 26                 | 118 | -1.08 |
| Houts (1998)                                | wives    | CWB     | MOQ   | 2        | 14                 | 118 | -0.58 |
| Houts (1998)                                | wives    | CWB     | MOQ   | 2        | 26                 | 118 | -0.91 |
| Houts (1998)                                | wives    | CWB     | MOQ   | 2        | 14                 | 118 | -0.54 |
| Houts (1998)                                | wives    | CWB     | MOQ   | 2        | 26                 | 118 | -0.89 |
| Johnson et al. (2005)                       | Husbands | CWB     | MAT   | 3        | 12                 | 162 | -0.24 |
| Johnson et al. (2005)                       | Husbands | CWB     | MAT   | 3        | 18                 | 163 | -0.19 |
| Johnson et al. (2005)                       | Husbands | CWB     | MAT   | 3        | 21                 | 135 | -0.34 |
| Johnson et al. (2005)                       | Husbands | CWB     | MAT   | 3        | 27                 | 134 | -0.41 |
| Johnson et al. (2005)                       | Husbands | CWB     | MAT   | 3        | 33                 | 135 | -0.40 |
| Johnson et al. (2005)                       | Husbands | CWB     | MAT   | 3        | 39                 | 121 | -0.56 |
| Johnson et al. (2005)                       | Husbands | CWB     | MAT   | 3        | 45                 | 127 | -0.51 |
| Johnson et al. (2005)                       | wives    | CWB     | MAT   | 3        | 12                 | 162 | -0.23 |
| Johnson et al. (2005)                       | wives    | CWB     | MAT   | 3        | 18                 | 163 | -0.24 |
| Johnson et al. (2005)                       | wives    | CWB     | MAT   | 3        | 21                 | 138 | -0.25 |
| Johnson et al. (2005)                       | wives    | CWB     | MAT   | 3        | 27                 | 136 | -0.45 |
| Johnson et al. (2005)                       | wives    | CWB     | MAT   | 3        | 33                 | 141 | -0.53 |

| <b>Publication</b>       | <b>Group</b> | <b>AWB/CWB</b> | <b>Scale</b> | <b>Time lag</b> | <b>Months since event</b> | <b>N</b> | <b>d</b> |
|--------------------------|--------------|----------------|--------------|-----------------|---------------------------|----------|----------|
| Johnson et al. (2005)    | wives        | CWB            | MAT          | 3               | 39                        | 124      | -0.03    |
| Johnson et al. (2005)    | wives        | CWB            | MAT          | 3               | 45                        | 128      | -0.73    |
| Karney & Bradbury (1997) | husbands     | CWB            | MAT          | 3               | 9                         | 54       | 0.05     |
| Karney & Bradbury (1997) | husbands     | CWB            | MAT          | 3               | 15                        | 54       | -0.26    |
| Karney & Bradbury (1997) | husbands     | CWB            | MAT          | 3               | 21                        | 54       | -0.17    |
| Karney & Bradbury (1997) | husbands     | CWB            | MAT          | 3               | 27                        | 54       | -0.43    |
| Karney & Bradbury (1997) | husbands     | CWB            | MAT          | 3               | 33                        | 54       | -0.45    |
| Karney & Bradbury (1997) | husbands     | CWB            | MAT          | 3               | 39                        | 54       | -0.44    |
| Karney & Bradbury (1997) | husbands     | CWB            | MAT          | 3               | 45                        | 54       | -0.40    |
| Karney & Bradbury (1997) | wives        | CWB            | MAT          | 3               | 9                         | 54       | 0.01     |
| Karney & Bradbury (1997) | wives        | CWB            | MAT          | 3               | 15                        | 54       | -0.42    |
| Karney & Bradbury (1997) | wives        | CWB            | MAT          | 3               | 21                        | 54       | -0.19    |
| Karney & Bradbury (1997) | wives        | CWB            | MAT          | 3               | 27                        | 54       | -0.44    |
| Karney & Bradbury (1997) | wives        | CWB            | MAT          | 3               | 33                        | 54       | -0.68    |
| Karney & Bradbury (1997) | wives        | CWB            | MAT          | 3               | 39                        | 54       | -0.43    |
| Karney & Bradbury (1997) | wives        | CWB            | MAT          | 3               | 45                        | 54       | -0.27    |
| Kurdek (1999)            | men          | CWB            | DAS          | 5               | 17                        | 93       | -0.34    |
| Kurdek (1999)            | men          | CWB            | DAS          | 5               | 29                        | 93       | -0.35    |
| Kurdek (1999)            | men          | CWB            | DAS          | 5               | 41                        | 93       | -0.56    |
| Kurdek (1999)            | men          | CWB            | DAS          | 5               | 53                        | 93       | -0.62    |
| Kurdek (1999)            | men          | CWB            | DAS          | 5               | 65                        | 93       | -0.59    |
| Kurdek (1999)            | men          | CWB            | DAS          | 5               | 77                        | 93       | -0.59    |
| Kurdek (1999)            | men          | CWB            | DAS          | 5               | 89                        | 93       | -0.58    |
| Kurdek (1999)            | men          | CWB            | DAS          | 5               | 101                       | 93       | -0.75    |
| Kurdek (1999)            | men          | CWB            | DAS          | 5               | 113                       | 93       | -0.77    |
| Kurdek (1999)            | women        | CWB            | DAS          | 5               | 17                        | 93       | -0.35    |
| Kurdek (1999)            | women        | CWB            | DAS          | 5               | 29                        | 93       | -0.39    |
| Kurdek (1999)            | women        | CWB            | DAS          | 5               | 41                        | 93       | -0.64    |
| Kurdek (1999)            | women        | CWB            | DAS          | 5               | 53                        | 93       | -0.65    |
| Kurdek (1999)            | women        | CWB            | DAS          | 5               | 65                        | 93       | -0.65    |
| Kurdek (1999)            | women        | CWB            | DAS          | 5               | 77                        | 93       | -0.73    |
| Kurdek (1999)            | women        | CWB            | DAS          | 5               | 89                        | 93       | -0.72    |
| Kurdek (1999)            | women        | CWB            | DAS          | 5               | 101                       | 93       | -0.91    |
| Kurdek (1999)            | women        | CWB            | DAS          | 5               | 113                       | 93       | -1.09    |
| Neff & Karney (2007)     | husbands     | CWB            | SMD          | 3               | 9                         | 163      | -0.36    |
| Neff & Karney (2007)     | husbands     | CWB            | SMD          | 3               | 15                        | 161      | -0.34    |
| Neff & Karney (2007)     | husbands     | CWB            | SMD          | 3               | 21                        | 145      | -0.27    |
| Neff & Karney (2007)     | husbands     | CWB            | SMD          | 3               | 27                        | 139      | -0.38    |
| Neff & Karney (2007)     | husbands     | CWB            | SMD          | 3               | 33                        | 113      | -0.36    |
| Neff & Karney (2007)     | husbands     | CWB            | SMD          | 3               | 39                        | 126      | -0.61    |
| Neff & Karney (2007)     | wives        | CWB            | SMD          | 3               | 9                         | 163      | -0.43    |
| Neff & Karney (2007)     | wives        | CWB            | SMD          | 3               | 15                        | 161      | -0.30    |

| <b>Publication</b>    | <b>Group</b>     | <b>AWB/CWB</b> | <b>Scale</b> | <b>Time lag</b> | <b>Months since event</b> | <b><i>N</i></b> | <b><i>d</i></b> |
|-----------------------|------------------|----------------|--------------|-----------------|---------------------------|-----------------|-----------------|
| Neff & Karney (2007)  | wives            | CWB            | SMD          | 3               | 21                        | 149             | -0.22           |
| Neff & Karney (2007)  | wives            | CWB            | SMD          | 3               | 27                        | 142             | -0.37           |
| Neff & Karney (2007)  | wives            | CWB            | SMD          | 3               | 33                        | 116             | -0.37           |
| Neff & Karney (2007)  | wives            | CWB            | SMD          | 3               | 39                        | 128             | -0.59           |
| Odell & Quinn (1998)  |                  | CWB            | MAT          | 1               | 6                         | 38              | -0.18           |
| Shebilske (2000)      | husbands         | CWB            | MOQ          | 1               | 12                        | 74              | -0.54           |
| Shebilske (2000)      | husbands         | CWB            | MOQ          | 1               | 24                        | 74              | -0.84           |
| Shebilske (2000)      | husbands         | CWB            | MOQ          | 1               | 156                       | 74              | -1.47           |
| Shebilske (2000)      | wives            | CWB            | MOQ          | 1               | 12                        | 74              | -0.40           |
| Shebilske (2000)      | wives            | CWB            | MOQ          | 1               | 24                        | 74              | -0.55           |
| Shebilske (2000)      | wives            | CWB            | MOQ          | 1               | 156                       | 74              | -1.17           |
| Watson & DeMeo (1987) | cohabitators     | CWB            | DAS          | 6               | 42                        | 130             | -0.19           |
| Watson & DeMeo (1987) | Non-Cohabitators | CWB            | DAS          | 6               | 42                        | 56              | -0.44           |

*Notes.* AWB = affective well-being. CWB = cognitive well-being. Time lag = time between baseline and event in months. *N* = sample size. *d* = bias-corrected standardized mean change. The abbreviations for the scales are listed in Table 5.



Table 8. Prospective effect sizes for divorce.

| Publication                               | Group | AWB/CWB | Scale                  | Time lag | Months since event | N   | d     |
|-------------------------------------------|-------|---------|------------------------|----------|--------------------|-----|-------|
| Doherty, Su & Needle (1989)               | men   | AWB     | GWB                    | -12      | 5                  | 21  | 0.25  |
| Doherty, Su & Needle (1989)               | women | AWB     | GWB                    | -12      | 5                  | 25  | -0.25 |
| Lee & Gramotnev (2007)                    |       | AWB     | CES-D                  | -18      | 18                 | 546 | -0.05 |
| Lee & Gramotnev (2007)                    |       | CWB     | Self-constructed scale | -18      | 18                 | 546 | 0.17  |
| Lucas (2005)                              |       | CWB     | Single Item            | -0.5     | 6                  | 860 | 0.05  |
| Lucas (2005)                              |       | CWB     | Single Item            | -0.5     | 18                 | 803 | 0.09  |
| Lucas (2005)                              |       | CWB     | Single Item            | -0.5     | 30                 | 714 | 0.11  |
| Lucas (2005)                              |       | CWB     | Single Item            | -0.5     | 42                 | 618 | 0.19  |
| Lucas (2005)                              |       | CWB     | Single Item            | -0.5     | 54                 | 542 | 0.19  |
| Lucas (2005)                              |       | CWB     | Single Item            | -0.5     | 66                 | 463 | 0.28  |
| Lucas (2005)                              |       | CWB     | Single Item            | -0.5     | 78                 | 394 | 0.25  |
| Lucas (2005)                              |       | CWB     | Single Item            | -0.5     | 90                 | 325 | 0.27  |
| Lucas (2005)                              |       | CWB     | Single Item            | -0.5     | 102                | 271 | 0.18  |
| Menaghan & Lieberman (1986)               |       | AWB     | HSC                    | -24      | 24                 | 32  | -0.30 |
| Prigerson, Maciejewski & Rosenheck (1999) |       | AWB     | CES-D                  | -18      | 18                 | 35  | 0.08  |
| Yap, Anusic & Lucas (2010a)               |       | CWB     | Single Item            | -6       | 6                  | 321 | 0.06  |
| Yap, Anusic & Lucas (2010a)               |       | CWB     | Single Item            | -6       | 18                 | 266 | 0.11  |
| Yap, Anusic & Lucas (2010a)               |       | CWB     | Single Item            | -6       | 30                 | 233 | 0.18  |
| Yap, Anusic & Lucas (2010a)               |       | CWB     | Single Item            | -6       | 42                 | 183 | 0.13  |
| Yap, Anusic & Lucas (2010a)               |       | CWB     | Single Item            | -6       | 54                 | 150 | 0.27  |
| Yap, Anusic & Lucas (2010a)               |       | CWB     | Single Item            | -6       | 66                 | 145 | 0.23  |
| Yap, Anusic & Lucas (2010a)               |       | CWB     | Single Item            | -6       | 78                 | 107 | 0.20  |
| Yap, Anusic & Lucas (2010a)               |       | CWB     | Single Item            | -6       | 90                 | 84  | 0.19  |
| Yap, Anusic & Lucas (2010a)               |       | CWB     | Single Item            | -6       | 102                | 54  | 0.02  |
| Yap, Anusic & Lucas (2010b)               |       | CWB     | Single Item            | -6       | 6                  | 178 | 0.03  |
| Yap, Anusic & Lucas (2010b)               |       | CWB     | Single Item            | -6       | 18                 | 132 | 0.05  |
| Yap, Anusic & Lucas (2010b)               |       | CWB     | Single Item            | -6       | 30                 | 93  | 0.00  |
| Yap, Anusic & Lucas (2010b)               |       | CWB     | Single Item            | -6       | 42                 | 72  | 0.08  |

| <b>Publication</b>          | <b>Group</b> | <b>AWB/CWB</b> | <b>Scale</b> | <b>Time lag</b> | <b>Months since event</b> | <b><i>N</i></b> | <b><i>d</i></b> |
|-----------------------------|--------------|----------------|--------------|-----------------|---------------------------|-----------------|-----------------|
| Yap, Anusic & Lucas (2010b) |              | CWB            | Single Item  | -6              | 54                        | 46              | 0.01            |
| Yap, Anusic & Lucas (2010b) |              | CWB            | Single Item  | -6              | 66                        | 41              | 0.13            |
| Yap, Anusic & Lucas (2010b) |              | CWB            | Single Item  | -6              | 78                        | 21              | 0.16            |
| Yap, Anusic & Lucas (2010b) |              | CWB            | Single Item  | -6              | 90                        | 8               | 0.27            |

*Notes.* AWB = affective well-being. CWB = cognitive well-being. Time lag = time between baseline and event in months. *N* = sample size. *d* = bias-corrected standardized mean change. The abbreviations for the scales are listed in Table 5.

Table 9. Post-hoc effect sizes for divorce.

| <b>Publication</b>                      | <b>Group</b> | <b>AWB/CWB</b> | <b>Scale</b>    | <b>Time lag</b> | <b>Months since event</b> | <b><i>N</i></b> | <b><i>d</i></b> |
|-----------------------------------------|--------------|----------------|-----------------|-----------------|---------------------------|-----------------|-----------------|
| Krumrei (2009)                          |              | AWB            | CES-D           | 3.32            | 15                        | 89              | 0.51            |
| Lorenz, Wickrama, Conger & Elder (2006) |              | AWB            | SCL-90-R        | 6               | 18                        | 80              | 0.24            |
| Lorenz, Wickrama, Conger & Elder (2006) |              | AWB            | SCL-90-R        | 6               | 42                        | 80              | 0.17            |
| Lorenz, Wickrama, Conger & Elder (2006) |              | AWB            | SCL-90-R        | 6               | 120                       | 80              | 0.28            |
| Nelson (1994)                           |              | CWB            | Composite score | 7               | 12                        | 9               | 0.30            |
| Nelson (1994)                           |              | CWB            | Composite score | 7               | 24                        | 9               | 0.37            |
| Nelson (1994)                           |              | CWB            | Composite score | 7               | 72                        | 9               | 0.16            |
| Webb (2009)                             |              | AWB            | CES-D           | 2               | 8                         | 245             | 0.24            |
| Webb (2009)                             |              | AWB            | CES-D           | 2               | 14                        | 235             | 0.40            |

*Notes.* AWB = affective well-being. CWB = cognitive well-being. Time lag = time between baseline and event in months. *N* = sample size. *d* = bias-corrected standardized mean change. The abbreviations for the scales are listed in Table 5.

Table 10. Prospective effect sizes for bereavement.

| Publication                                                          | Group               | AWB/CWB | Scale                                                    | Time lag | Months since event | N   | d     |
|----------------------------------------------------------------------|---------------------|---------|----------------------------------------------------------|----------|--------------------|-----|-------|
| Boerner, Schulz & Horowitz (2004)                                    |                     | AWB     | CES-D                                                    | -4       | 4                  | 217 | -0.03 |
| Bond, Clark & Davies (2003)                                          |                     | AWB     | Geriatric Depression Scale (GDS; Brink et al., 1982)     | -12.5    | 12.5               | 37  | 0.43  |
| Burton, Haley, Small, Finley, Dillinger-Vasille & Schonwetter (2008) |                     | AWB     | CES-D                                                    | -3.5     | 4.5                | 50  | -0.74 |
| Burton, Haley, Small, Finley, Dillinger-Vasille & Schonwetter (2008) |                     | CWB     | Life Satisfaction Index-Z (Wood, Wylie, & Sheafor, 1969) | -3.5     | 4.5                | 50  | -0.21 |
| Collins, Stommel, Wang & Given (1994)                                |                     | AWB     | CES-D                                                    | -11      | 11                 | 47  | 0.24  |
| Collins, Stommel, Wang & Given (1994)                                |                     | AWB     | CES-D                                                    | -11      | 26                 | 47  | 0.49  |
| Folkman, Chesney, Collette, Boccellari & Cooke (1996)                | HIV - caregivers    | AWB     | CES-D                                                    | -3       | 0.5                | 73  | -0.94 |
| Folkman, Chesney, Collette, Boccellari & Cooke (1996)                | HIV - caregivers    | AWB     | CES-D                                                    | -3       | 1                  | 73  | -0.47 |
| Folkman, Chesney, Collette, Boccellari & Cooke (1996)                | HIV - caregivers    | AWB     | CES-D                                                    | -3       | 3                  | 73  | -0.09 |
| Folkman, Chesney, Collette, Boccellari & Cooke (1996)                | HIV - caregivers    | AWB     | CES-D                                                    | -3       | 5                  | 73  | -0.04 |
| Folkman, Chesney, Collette, Boccellari & Cooke (1996)                | HIV - caregivers    | AWB     | CES-D                                                    | -3       | 7                  | 73  | 0.15  |
| Folkman, Chesney, Collette, Boccellari & Cooke (1996)                | HIV + caregivers    | AWB     | CES-D                                                    | -3       | 0.5                | 37  | -0.77 |
| Folkman, Chesney, Collette, Boccellari & Cooke (1996)                | HIV + caregivers    | AWB     | CES-D                                                    | -3       | 1                  | 37  | -0.15 |
| Folkman, Chesney, Collette, Boccellari & Cooke (1996)                | HIV + caregivers    | AWB     | CES-D                                                    | -3       | 3                  | 37  | 0.04  |
| Folkman, Chesney, Collette, Boccellari & Cooke (1996)                | HIV + caregivers    | AWB     | CES-D                                                    | -3       | 5                  | 37  | 0.06  |
| Folkman, Chesney, Collette, Boccellari & Cooke (1996)                | HIV + caregivers    | AWB     | CES-D                                                    | -3       | 7                  | 37  | 0.10  |
| Folkman, Chesney, Collette, Boccellari & Cooke (1996)                | HIV + noncaregivers | AWB     | CES-D                                                    | -3       | 3                  | 53  | 0.12  |
| Folkman, Chesney, Collette, Boccellari & Cooke (1996)                | HIV + noncaregivers | AWB     | CES-D                                                    | -3       | 5                  | 53  | 0.03  |

| <b>Publication</b>                                              | <b>Group</b>        | <b>AWB/CWB</b> | <b>Scale</b>                                                                                            | <b>Time lag</b> | <b>Months since event</b> | <b>N</b> | <b>d</b> |
|-----------------------------------------------------------------|---------------------|----------------|---------------------------------------------------------------------------------------------------------|-----------------|---------------------------|----------|----------|
| Folkman, Chesney, Collette, Boccellari & Cooke (1996)           | HIV + noncaregivers | AWB            | CES-D                                                                                                   | -3              | 7                         | 53       | 0.00     |
| Li (2005)                                                       | Early event         | AWB            | CES-D                                                                                                   | -9              | 9                         | 63       | -0.31    |
| Li (2005)                                                       | Early event         | AWB            | CES-D                                                                                                   | -9              | 27                        | 63       | -0.16    |
| Li (2005)                                                       | Early event         | AWB            | CES-D                                                                                                   | -9              | 45                        | 63       | 0.14     |
| Li (2005)                                                       | Late event          | AWB            | CES-D                                                                                                   | -9              | 9                         | 52       | -0.22    |
| Li (2005)                                                       | Late event          | AWB            | CES-D                                                                                                   | -9              | 27                        | 52       | 0.26     |
| Li (2005)                                                       | Latest event        | AWB            | CES-D                                                                                                   | -9              | 9                         | 42       | -0.21    |
| Lucas, Clark, Georgellis & Diener (2003)                        |                     | CWB            | Single Item                                                                                             | -0.5            | 6                         | 457      | -0.39    |
| Lucas, Clark, Georgellis & Diener (2003)                        |                     | CWB            | Single Item                                                                                             | -0.5            | 18                        | 431      | -0.08    |
| Lucas, Clark, Georgellis & Diener (2003)                        |                     | CWB            | Single Item                                                                                             | -0.5            | 30                        | 382      | 0.03     |
| Lucas, Clark, Georgellis & Diener (2003)                        |                     | CWB            | Single Item                                                                                             | -0.5            | 42                        | 325      | 0.10     |
| Lucas, Clark, Georgellis & Diener (2003)                        |                     | CWB            | Single Item                                                                                             | -0.5            | 54                        | 268      | 0.12     |
| Lucas, Clark, Georgellis & Diener (2003)                        |                     | CWB            | Single Item                                                                                             | -0.5            | 66                        | 214      | 0.13     |
| Lucas, Clark, Georgellis & Diener (2003)                        |                     | CWB            | Single Item                                                                                             | -0.5            | 78                        | 172      | 0.12     |
| Lucas, Clark, Georgellis & Diener (2003)                        |                     | CWB            | Single Item                                                                                             | -0.5            | 90                        | 137      | 0.12     |
| Lucas, Clark, Georgellis & Diener (2003)                        |                     | CWB            | Single Item                                                                                             | -0.5            | 102                       | 102      | 0.26     |
| Mullan (1992)                                                   |                     | AWB            | Self-constructed scale                                                                                  | -6              | 6                         | 67       | -0.01    |
| Murrell & Himmelfarb (1989)                                     |                     | AWB            | CES-D                                                                                                   | -3              | 3                         | 1479     | 0.05     |
| Murrell & Himmelfarb (1989)                                     |                     | AWB            | CES-D                                                                                                   | -3              | 9                         | 1479     | 0.03     |
| Persson, Östlund, Wennman-Larsen, Wengström & Gustavsson (2008) |                     | AWB            | Swedish Health-Related Quality of Life Survey (Brorsson, Ifver, & Hays, 1993), positive affect subscale | -7.6            | 6                         | 37       | 0.04     |

| <b>Publication</b>                                              | <b>Group</b> | <b>AWB/CWB</b> | <b>Scale</b>                                                                                            | <b>Time lag</b> | <b>Months since event</b> | <b>N</b> | <b>d</b> |
|-----------------------------------------------------------------|--------------|----------------|---------------------------------------------------------------------------------------------------------|-----------------|---------------------------|----------|----------|
| Persson, Östlund, Wennman-Larsen, Wengström & Gustavsson (2008) |              | AWB            | Swedish Health-Related Quality of Life Survey (Brorsson, Ifver, & Hays, 1993), negative affect subscale | -7.6            | 6                         | 37       | 0.00     |
| Prigerson, Frank, Kasl & Reynolds (1995)                        |              | AWB            | CES-D                                                                                                   | -18             | 18                        | 75       | -0.43    |
| Rhee (2007)                                                     |              | AWB            | CES-D                                                                                                   | -6              | 6                         | 210      | -0.32    |
| Rhee (2007)                                                     |              | AWB            | CES-D                                                                                                   | -6              | 18                        | 178      | -0.10    |
| Rhee (2007)                                                     |              | AWB            | CES-D                                                                                                   | -6              | 48                        | 85       | 0.19     |
| Rossi Ferrario, Cardillo, Vicario, Balzarini & Zotti (2004)     |              | CWB            | SWLS                                                                                                    | -2              | 3                         | 93       | -0.23    |
| Rossi Ferrario, Cardillo, Vicario, Balzarini & Zotti (2004)     |              | CWB            | SWLS                                                                                                    | -2              | 6                         | 93       | -0.37    |
| Rossi Ferrario, Cardillo, Vicario, Balzarini & Zotti (2004)     |              | CWB            | SWLS                                                                                                    | -2              | 12                        | 93       | -0.36    |
| Switzer, Dew, Magistro, Goycoolea, Twillman, et al. (1998)      |              | AWB            | Depressive Affect Scale (Rosenberg, 1965)                                                               | -6              | 6                         | 13       | 0.45     |
| Switzer, Dew, Magistro, Goycoolea, Twillman, et al. (1998)      |              | CWB            | Single Item                                                                                             | -6              | 6                         | 13       | 0.13     |
| Torges, Stewart & Nolen-Hoeksema (2008)                         |              | AWB            | Depression Inventory (Zimmerman & Coryell, 1987)                                                        | -2.2            | 1                         | 147      | 0.26     |
| Torges, Stewart & Nolen-Hoeksema (2008)                         |              | AWB            | Depression Inventory (Zimmerman & Coryell, 1987)                                                        | -2.2            | 6                         | 147      | 0.52     |
| Torges, Stewart & Nolen-Hoeksema (2008)                         |              | AWB            | Depression Inventory (Zimmerman & Coryell, 1987)                                                        | -2.2            | 18                        | 147      | 0.75     |

| Publication                                                | Group | AWB/CWB | Scale                                                                            | Time lag | Months since event | <i>N</i> | <i>d</i> |
|------------------------------------------------------------|-------|---------|----------------------------------------------------------------------------------|----------|--------------------|----------|----------|
| Vinkers, Gussekloo, Stek, Westendorp & van der Mast (2004) |       | AWB     | Geriatric Depression Scale-15 (Yesavage et al., 1982; Sheikh and Yesavage, 1986) | -19.2    | 19.2               | 32       | -0.51    |
| Yap, Anusic & Lucas (2010a)                                |       | CWB     | Single Item                                                                      | -6       | 6                  | 411      | -0.28    |
| Yap, Anusic & Lucas (2010a)                                |       | CWB     | Single Item                                                                      | -6       | 18                 | 387      | -0.10    |
| Yap, Anusic & Lucas (2010a)                                |       | CWB     | Single Item                                                                      | -6       | 30                 | 306      | -0.12    |
| Yap, Anusic & Lucas (2010a)                                |       | CWB     | Single Item                                                                      | -6       | 42                 | 241      | -0.03    |
| Yap, Anusic & Lucas (2010a)                                |       | CWB     | Single Item                                                                      | -6       | 54                 | 190      | 0.00     |
| Yap, Anusic & Lucas (2010a)                                |       | CWB     | Single Item                                                                      | -6       | 66                 | 165      | -0.03    |
| Yap, Anusic & Lucas (2010a)                                |       | CWB     | Single Item                                                                      | -6       | 78                 | 123      | -0.10    |
| Yap, Anusic & Lucas (2010a)                                |       | CWB     | Single Item                                                                      | -6       | 90                 | 99       | -0.14    |
| Yap, Anusic & Lucas (2010a)                                |       | CWB     | Single Item                                                                      | -6       | 102                | 62       | 0.01     |
| Yap, Anusic & Lucas (2010b)                                |       | CWB     | Single Item                                                                      | -6       | 6                  | 93       | -0.41    |
| Yap, Anusic & Lucas (2010b)                                |       | CWB     | Single Item                                                                      | -6       | 18                 | 72       | -0.13    |
| Yap, Anusic & Lucas (2010b)                                |       | CWB     | Single Item                                                                      | -6       | 30                 | 55       | 0.07     |
| Yap, Anusic & Lucas (2010b)                                |       | CWB     | Single Item                                                                      | -6       | 42                 | 40       | -0.12    |
| Yap, Anusic & Lucas (2010b)                                |       | CWB     | Single Item                                                                      | -6       | 54                 | 26       | -0.30    |
| Yap, Anusic & Lucas (2010b)                                |       | CWB     | Single Item                                                                      | -6       | 66                 | 19       | 0.15     |
| Yap, Anusic & Lucas (2010b)                                |       | CWB     | Single Item                                                                      | -6       | 78                 | 18       | 0.06     |
| Yap, Anusic & Lucas (2010b)                                |       | CWB     | Single Item                                                                      | -6       | 90                 | 13       | -0.06    |

Notes. AWB = affective well-being. CWB = cognitive well-being. Time lag = time between baseline and event in months. *N* = sample size. *d* = bias-corrected standardized mean change. The abbreviations for the scales are listed in Table 5.

Table 11. Post-hoc effect sizes for bereavement.

| Publication                                     | Group | AWB/CWB | Scale                              | Time lag | Months since event | N   | d     |
|-------------------------------------------------|-------|---------|------------------------------------|----------|--------------------|-----|-------|
| Aneshensel, Botticello & Yamamoto-Mitani (2004) |       | AWB     | HSC, depression subscale           | 6        | 18                 | 229 | 0.22  |
| Aneshensel, Botticello & Yamamoto-Mitani (2004) |       | AWB     | HSC, depression subscale           | 6        | 30                 | 178 | 0.20  |
| Aneshensel, Botticello & Yamamoto-Mitani (2004) |       | AWB     | HSC, depression subscale           | 6        | 42                 | 119 | 0.26  |
| Aneshensel, Botticello & Yamamoto-Mitani (2004) |       | AWB     | HSC, depression subscale           | 6        | 56                 | 54  | 0.41  |
| Beem, Maes, Cleiren, Schut & Garssen (2000)     |       | AWB     | SCL-90, depression subscale        | 4.3      | 7                  | 64  | 0.21  |
| Beem, Maes, Cleiren, Schut & Garssen (2000)     |       | AWB     | SCL-90, depression subscale        | 4.3      | 10                 | 64  | 0.32  |
| Beem, Maes, Cleiren, Schut & Garssen (2000)     |       | AWB     | SCL-90, depression subscale        | 4.3      | 13                 | 64  | 0.47  |
| Bergner, Beyer, Klapp & Rauchfuß (2009)         |       | AWB     | Depression scale by Zerssen (1976) | 2        | 7                  | 143 | -0.70 |
| Bergner, Beyer, Klapp & Rauchfuß (2009)         |       | AWB     | Depression scale by Zerssen (1976) | 2        | 14                 | 58  | 0.09  |
| Broen, Moum, Bødtker & Ekeberg (2005)           |       | AWB     | HADS, depression subscale          | 0.3      | 6                  | 40  | 0.35  |
| Broen, Moum, Bødtker & Ekeberg (2005)           |       | AWB     | HADS, depression subscale          | 0.3      | 12                 | 39  | 0.51  |
| Broen, Moum, Bødtker & Ekeberg (2005)           |       | AWB     | HADS, depression subscale          | 0.3      | 60                 | 39  | 0.58  |
| Broen, Moum, Bødtker & Ekeberg (2005)           |       | CWB     | Self-constructed scale             | 0.3      | 6                  | 40  | 0.37  |
| Broen, Moum, Bødtker & Ekeberg (2005)           |       | CWB     | Self-constructed scale             | 0.3      | 12                 | 39  | 0.60  |
| Broen, Moum, Bødtker & Ekeberg (2005)           |       | CWB     | Self-constructed scale             | 0.3      | 60                 | 39  | 0.57  |
| Cordle & Prettyman (1994)                       |       | AWB     | HADS, depression subscale          | 3        | 24                 | 50  | 0.11  |



| Publication                                    | Group             | AWB/CWB | Scale                                                    | Time lag | Months since event | <i>N</i> | <i>d</i> |
|------------------------------------------------|-------------------|---------|----------------------------------------------------------|----------|--------------------|----------|----------|
| Haas-Hawkings, Sangster, Ziegler & Reid (1985) |                   | CWB     | Life Satisfaction Index-Z (Wood, Wylie, & Sheafor, 1969) | 2        | 18                 | 29       | 0.66     |
| Hobfoll & Leiberan (1987)                      |                   | AWB     | CES-D, short version                                     | 0.01     | 3                  | 19       | 0.55     |
| Lang (2003)                                    | husbands          | CWB     | ENRICH marital satisfaction scale (Fowers & Olson, 1993) | 2        | 6                  | 96       | -0.18    |
| Lang (2003)                                    | husbands          | CWB     | ENRICH marital satisfaction scale (Fowers & Olson, 1993) | 2        | 13                 | 87       | -0.11    |
| Lang (2003)                                    | wives             | CWB     | ENRICH marital satisfaction scale (Fowers & Olson, 1993) | 2        | 6                  | 96       | -0.10    |
| Lang (2003)                                    | wives             | CWB     | ENRICH marital satisfaction scale (Fowers & Olson, 1993) | 2        | 13                 | 87       | 0.04     |
| Levy & Derby (1992)                            | no support groups | AWB     | CES-D                                                    | 3        | 6                  | 96       | 0.36     |
| Levy & Derby (1992)                            | support groups    | AWB     | CES-D                                                    | 3        | 6                  | 40       | 0.10     |
| Lindström (1995)                               |                   | AWB     | GHQ                                                      | 1.5      | 12                 | 39       | -0.91    |
| Lindström (1995)                               |                   | AWB     | GWB                                                      | 1.5      | 12                 | 39       | 0.78     |
| Lund, Caserta & Dimond (1986)                  | females           | CWB     | Life satisfaction Index-A (Liang, 1984)                  | 1        | 2                  | 116      | -0.05    |
| Lund, Caserta & Dimond (1986)                  | females           | CWB     | Life satisfaction Index-A (Liang, 1984)                  | 1        | 6                  | 112      | -0.08    |
| Lund, Caserta & Dimond (1986)                  | females           | CWB     | Life satisfaction Index-A (Liang, 1984)                  | 1        | 12                 | 106      | -0.08    |

| <b>Publication</b>                            | <b>Group</b> | <b>AWB/CWB</b> | <b>Scale</b>                            | <b>Time lag</b> | <b>Months since event</b> | <b><i>N</i></b> | <b><i>d</i></b> |
|-----------------------------------------------|--------------|----------------|-----------------------------------------|-----------------|---------------------------|-----------------|-----------------|
| Lund, Caserta & Dimond (1986)                 | females      | CWB            | Life satisfaction Index-A (Liang, 1984) | 1               | 18                        | 101             | -0.13           |
| Lund, Caserta & Dimond (1986)                 | females      | CWB            | Life satisfaction Index-A (Liang, 1984) | 1               | 24                        | 108             | 0.16            |
| Lund, Caserta & Dimond (1986)                 | males        | CWB            | Life satisfaction Index-A (Liang, 1984) | 1               | 2                         | 47              | -0.16           |
| Lund, Caserta & Dimond (1986)                 | males        | CWB            | Life satisfaction Index-A (Liang, 1984) | 1               | 6                         | 43              | -0.08           |
| Lund, Caserta & Dimond (1986)                 | males        | CWB            | Life satisfaction Index-A (Liang, 1984) | 1               | 12                        | 35              | 0.10            |
| Lund, Caserta & Dimond (1986)                 | males        | CWB            | Life satisfaction Index-A (Liang, 1984) | 1               | 18                        | 33              | 0.18            |
| Lund, Caserta & Dimond (1986)                 | males        | CWB            | Life satisfaction Index-A (Liang, 1984) | 1               | 24                        | 31              | 0.23            |
| Maciejewski, Zhang, Block & Prigerson (2007)  |              | AWB            | Single Item                             | 3.5             | 11                        | 213             | 0.00            |
| Maciejewski, Zhang, Block & Prigerson (2007)  |              | AWB            | Single Item                             | 3.5             | 20                        | 205             | 0.39            |
| Middleton, Raphael, Burnett & Martinek (1997) |              | AWB            | GHQ, depression subscale                | 1               | 2.5                       | 115             | 0.06            |
| Middleton, Raphael, Burnett & Martinek (1997) |              | AWB            | GHQ, depression subscale                | 1               | 7                         | 115             | 0.09            |
| Middleton, Raphael, Burnett & Martinek (1997) |              | AWB            | GHQ, depression subscale                | 1               | 13                        | 115             | 0.24            |
| Murphy, Johnson & Lohan (2002)                | fathers      | AWB            | BSI, depression subscale                | 4               | 12                        | 58              | 0.36            |
| Murphy, Johnson & Lohan (2002)                | fathers      | AWB            | BSI, depression subscale                | 4               | 60                        | 58              | 0.34            |
| Murphy, Johnson & Lohan (2002)                | mothers      | AWB            | BSI, depression subscale                | 4               | 12                        | 115             | 0.50            |

| <b>Publication</b>                                                                        | <b>Group</b>          | <b>AWB/CWB</b> | <b>Scale</b>                | <b>Time lag</b> | <b>Months since event</b> | <b>N</b> | <b>d</b> |
|-------------------------------------------------------------------------------------------|-----------------------|----------------|-----------------------------|-----------------|---------------------------|----------|----------|
| Murphy, Johnson & Lohan (2002)                                                            | mothers               | AWB            | BSI, depression subscale    | 4               | 60                        | 115      | 0.64     |
| Ott & Lueger (2002)                                                                       | 12 months after death | AWB            | Self-constructed scale      | 12              | 15                        | 19       | 0.07     |
| Ott & Lueger (2002)                                                                       | 12 months after death | AWB            | Self-constructed scale      | 12              | 18                        | 19       | 0.13     |
| Ott & Lueger (2002)                                                                       | 3 months after death  | AWB            | Self-constructed scale      | 3               | 6                         | 18       | 0.42     |
| Ott & Lueger (2002)                                                                       | 3 months after death  | AWB            | Self-constructed scale      | 3               | 9                         | 18       | 0.62     |
| Ott & Lueger (2002)                                                                       | 6 months after death  | AWB            | Self-constructed scale      | 6               | 9                         | 20       | 0.33     |
| Ott & Lueger (2002)                                                                       | 6 months after death  | AWB            | Self-constructed scale      | 6               | 12                        | 20       | 0.46     |
| Ott & Lueger (2002)                                                                       | 9 months after death  | AWB            | Self-constructed scale      | 9               | 12                        | 27       | 0.06     |
| Ott & Lueger (2002)                                                                       | 9 months after death  | AWB            | Self-constructed scale      | 9               | 15                        | 27       | 0.11     |
| Prigerson, Frank, Kasl & Reynolds (1995)                                                  |                       | AWB            | Single item                 | 2.7             | 18                        | 54       | 1.42     |
| Reich, Zautra & Guarnaccia (1989)                                                         |                       | AWB            | Composite Score             | 3               | 4                         | 58       | 0.04     |
| Reich, Zautra & Guarnaccia (1989)                                                         |                       | AWB            | Composite Score             | 3               | 4                         | 58       | 0.13     |
| Surtees & Miller (1994)                                                                   |                       | AWB            | GHQ                         | 1.5             | 4                         | 58       | 0.60     |
| Wijngaards-de Meij, Stroebe, Schut, Stroebe, van den Bout, van der Heijden, et al. (2008) | husbands              | AWB            | SCL-90, depression subscale | 6               | 13                        | 180      | 0.09     |
| Wijngaards-de Meij, Stroebe, Schut, Stroebe, van den Bout, van der Heijden, et al. (2008) | husbands              | AWB            | SCL-90, depression subscale | 6               | 20                        | 180      | 0.17     |

| <b>Publication</b>                                                                        | <b>Group</b> | <b>AWB/CWB</b> | <b>Scale</b>                | <b>Time lag</b> | <b>Months since event</b> | <b><i>N</i></b> | <b><i>d</i></b> |
|-------------------------------------------------------------------------------------------|--------------|----------------|-----------------------------|-----------------|---------------------------|-----------------|-----------------|
| Wijngaards-de Meij, Stroebe, Schut, Stroebe, van den Bout, van der Heijden, et al. (2008) | wives        | AWB            | SCL-90, depression subscale | 6               | 13                        | 180             | 0.10            |
| Wijngaards-de Meij, Stroebe, Schut, Stroebe, van den Bout, van der Heijden, et al. (2008) | wives        | AWB            | SCL-90, depression subscale | 6               | 20                        | 180             | 0.23            |

*Notes.* AWB = affective well-being. CWB = cognitive well-being. Time lag = time between baseline and event in months. *N* = sample size. *d* = bias-corrected standardized mean change. The abbreviations for the scales are listed in Table 5.

Table 12. Prospective effect sizes for child birth.

| Publication                            | Group                 | AWB/CWB | Scale                                                                                                       | Time lag | Months since event | N   | d     |
|----------------------------------------|-----------------------|---------|-------------------------------------------------------------------------------------------------------------|----------|--------------------|-----|-------|
| Affonso, Lovett, Paul & Sheptak (1990) |                       | AWB     | Schedule for Affective Disorder and Schizophrenia (SADS; Endicott & Spitzer, 1977), subscale depressed mood | -2       | 0.5                | 202 | -0.29 |
| Affonso, Lovett, Paul & Sheptak (1990) |                       | AWB     | Schedule for Affective Disorder and Schizophrenia (SADS; Endicott & Spitzer, 1977), subscale depressed mood | -2       | 3.5                | 202 | 0.15  |
| Aradine & Ferketich (1990)             | high risk men         | AWB     | CES-D                                                                                                       | -3       | 1                  | 17  | 0.55  |
| Aradine & Ferketich (1990)             | high risk men         | AWB     | CES-D                                                                                                       | -3       | 4                  | 16  | 0.11  |
| Aradine & Ferketich (1990)             | high risk men         | AWB     | CES-D                                                                                                       | -3       | 0.1                | 19  | 0.38  |
| Aradine & Ferketich (1990)             | high risk women       | AWB     | CES-D                                                                                                       | -3       | 4                  | 39  | 0.39  |
| Aradine & Ferketich (1990)             | high risk women       | AWB     | CES-D                                                                                                       | -3       | 1                  | 43  | 0.26  |
| Aradine & Ferketich (1990)             | high risk women       | AWB     | CES-D                                                                                                       | -3       | 0.1                | 46  | 0.16  |
| Aradine & Ferketich (1990)             | low risk men          | AWB     | CES-D                                                                                                       | -3       | 1                  | 35  | -0.14 |
| Aradine & Ferketich (1990)             | low risk men          | AWB     | CES-D                                                                                                       | -3       | 4                  | 29  | -0.12 |
| Aradine & Ferketich (1990)             | low risk men          | AWB     | CES-D                                                                                                       | -3       | 0.1                | 37  | 0.00  |
| Aradine & Ferketich (1990)             | low risk women        | AWB     | CES-D                                                                                                       | -3       | 4                  | 53  | 0.16  |
| Aradine & Ferketich (1990)             | low risk women        | AWB     | CES-D                                                                                                       | -3       | 1                  | 58  | -0.31 |
| Aradine & Ferketich (1990)             | low risk women        | AWB     | CES-D                                                                                                       | -3       | 0.1                | 60  | -0.38 |
| Aradine & Ferketich (1990)             | premature birth men   | AWB     | CES-D                                                                                                       | -3       | 1                  | 27  | 0.88  |
| Aradine & Ferketich (1990)             | premature birth men   | AWB     | CES-D                                                                                                       | -3       | 4                  | 26  | 0.63  |
| Aradine & Ferketich (1990)             | premature birth men   | AWB     | CES-D                                                                                                       | -3       | 0.1                | 32  | 0.18  |
| Aradine & Ferketich (1990)             | premature birth women | AWB     | CES-D                                                                                                       | -3       | 1                  | 55  | 0.33  |

| <b>Publication</b>                        | <b>Group</b>          | <b>AWB/CWB</b> | <b>Scale</b>                | <b>Time lag</b> | <b>Months since event</b> | <b>N</b> | <b>d</b> |
|-------------------------------------------|-----------------------|----------------|-----------------------------|-----------------|---------------------------|----------|----------|
| Aradine & Ferketich (1990)                | premature birth women | AWB            | CES-D                       | -3              | 4                         | 47       | 0.68     |
| Aradine & Ferketich (1990)                | premature birth women | AWB            | CES-D                       | -3              | 0.1                       | 61       | 0.12     |
| Armstrong (2007)                          | fathers               | AWB            | CES-D                       | -1.5            | 12.3                      | 19       | 0.33     |
| Armstrong (2007)                          | mothers               | AWB            | CES-D                       | -1.5            | 12.3                      | 19       | 0.24     |
| Austin, Tully & Parker (2007)             |                       | AWB            | EPDS                        | -1.5            | 2                         | 575      | 0.29     |
| Besser, Priel & Wiznitzer (2002)          | high-risk             | AWB            | CES-D                       | -4              | 2                         | 100      | -0.45    |
| Besser, Priel & Wiznitzer (2002)          | low-risk              | AWB            | CES-D                       | -4              | 2                         | 100      | -0.15    |
| Bost, Cox, Burchinal & Payne (2002)       | husbands              | AWB            | CES-D                       | -1.5            | 3                         | 127      | -0.10    |
| Bost, Cox, Burchinal & Payne (2002)       | husbands              | AWB            | CES-D                       | -1.5            | 24                        | 132      | 0.06     |
| Bost, Cox, Burchinal & Payne (2002)       | husbands              | AWB            | CES-D                       | -1.5            | 12                        | 132      | -0.08    |
| Bost, Cox, Burchinal & Payne (2002)       | wives                 | AWB            | CES-D                       | -1.5            | 3                         | 126      | 0.32     |
| Bost, Cox, Burchinal & Payne (2002)       | wives                 | AWB            | CES-D                       | -1.5            | 24                        | 137      | 0.38     |
| Bost, Cox, Burchinal & Payne (2002)       | wives                 | AWB            | CES-D                       | -1.5            | 12                        | 135      | 0.27     |
| Bouchard, Lachance-Grzela & Goguen (2008) | men                   | CWB            | DAS                         | -2              | 6                         | 143      | -0.11    |
| Bouchard, Lachance-Grzela & Goguen (2008) | women                 | CWB            | DAS                         | -2              | 6                         | 143      | -0.28    |
| Bradley, Ross & Warnyca (1983)            | cesarean              | AWB            | DAACL                       | -4.5            | 1.5                       | 23       | -0.02    |
| Bradley, Ross & Warnyca (1983)            | cesarean              | AWB            | DAACL                       | -4.5            | 0.25                      | 25       | -0.68    |
| Bradley, Ross & Warnyca (1983)            | vaginal               | AWB            | DAACL                       | -4.5            | 1.5                       | 88       | -0.24    |
| Bradley, Ross & Warnyca (1983)            | vaginal               | AWB            | DAACL                       | -4.5            | 0.25                      | 90       | -0.65    |
| Buckwalter, et al. (1999)                 |                       | AWB            | SCL-90, depression subscale | -0.75           | 1                         | 19       | 0.74     |
| Buist, Morse & Durkin (2003)              |                       | AWB            | EPDS                        | -3.5            | 4                         | 152      | 0.42     |
| Buist, Morse & Durkin (2003)              |                       | AWB            | EPDS                        | -3.5            | 1                         | 225      | 0.42     |
| Carter, Baker & Brownell (2000)           |                       | AWB            | CES-D                       | -2.5            | 12                        | 64       | 0.03     |
| Carter, Baker & Brownell (2000)           |                       | AWB            | CES-D                       | -2.5            | 4                         | 64       | -0.13    |
| Chazan (1998)                             |                       | AWB            | CES-D                       | -3              | 4                         | 79       | 0.04     |

| Publication                                      | Group                  | AWB/CWB | Scale     | Time lag | Months since event | <i>N</i> | <i>d</i> |
|--------------------------------------------------|------------------------|---------|-----------|----------|--------------------|----------|----------|
| Condon, Boyce & Corkindale (2004)                |                        | CWB     | DAS       | -4       | 3                  | 276      | 0.04     |
| Condon, Boyce & Corkindale (2004)                |                        | CWB     | DAS       | -4       | 6                  | 241      | -0.02    |
| Condon, Boyce & Corkindale (2004)                |                        | CWB     | DAS       | -4       | 12                 | 222      | -0.13    |
| Condon, Boyce & Corkindale (2004)                |                        | AWB     | PANAS, NA | -4       | 6                  | 241      | 0.22     |
| Condon, Boyce & Corkindale (2004)                |                        | AWB     | PANAS, NA | -4       | 12                 | 222      | 0.24     |
| Condon, Boyce & Corkindale (2004)                |                        | AWB     | PANAS, NA | -4       | 3                  | 276      | 0.19     |
| Condon, Boyce & Corkindale (2004)                |                        | AWB     | PANAS, PA | -4       | 3                  | 276      | 0.09     |
| Condon, Boyce & Corkindale (2004)                |                        | AWB     | PANAS, PA | -4       | 6                  | 241      | 0.03     |
| Condon, Boyce & Corkindale (2004)                |                        | AWB     | PANAS, PA | -4       | 12                 | 222      | -0.02    |
| Cooke, Schmied & Sheehan (2007)                  | > 3 months b.f.        | AWB     | EPDS      | -2       | 3                  | 162      | 0.23     |
| Cooke, Schmied & Sheehan (2007)                  | 1,5-3 months b. f.     | AWB     | EPDS      | -2       | 3                  | 22       | 0.06     |
| Cooke, Schmied & Sheehan (2007)                  | 2 weeks breast feeding | AWB     | EPDS      | -2       | 3                  | 20       | 0.47     |
| Cooke, Schmied & Sheehan (2007)                  | 2-6 weeks b.f.         | AWB     | EPDS      | -2       | 3                  | 25       | 0.46     |
| Crittenden, Kim, Watanabe & Norr (2002)          |                        | AWB     | CES-D     | -1.5     | 36                 | 310      | 0.35     |
| Crittenden, Kim, Watanabe & Norr (2002)          |                        | AWB     | CES-D     | -1.5     | 12                 | 435      | 0.26     |
| Crittenden, Kim, Watanabe & Norr (2002)          |                        | AWB     | CES-D     | -1.5     | 24                 | 435      | 0.37     |
| Deater-Deckard, Pickering, Dunn & Golding (1998) |                        | AWB     | EPDS      | -5       | 2                  | 6667     | 0.09     |
| DeJoseph (1997)                                  | healthy pregnancy      | AWB     | CES-D     | -2.5     | 1                  | 218      | -0.15    |
| DeJoseph (1997)                                  | healthy pregnancy      | AWB     | CES-D     | -2.5     | 4                  | 218      | 0.06     |
| DeJoseph (1997)                                  | healthy pregnancy      | AWB     | CES-D     | -2.5     | 8                  | 218      | 0.01     |
| DeJoseph (1997)                                  | healthy pregnancy      | AWB     | CES-D     | -2.5     | 0.25               | 218      | -0.49    |
| DeJoseph (1997)                                  | high-risk pregnancy    | AWB     | CES-D     | -2.5     | 1                  | 153      | 0.34     |
| DeJoseph (1997)                                  | high-risk pregnancy    | AWB     | CES-D     | -2.5     | 4                  | 153      | 0.55     |
| DeJoseph (1997)                                  | high-risk pregnancy    | AWB     | CES-D     | -2.5     | 8                  | 153      | 0.63     |

| <b>Publication</b>                           | <b>Group</b>        | <b>AWB/CWB</b> | <b>Scale</b>                                                                | <b>Time lag</b> | <b>Months since event</b> | <b>N</b> | <b>d</b> |
|----------------------------------------------|---------------------|----------------|-----------------------------------------------------------------------------|-----------------|---------------------------|----------|----------|
| DeJoseph (1997)                              | high-risk pregnancy | AWB            | CES-D                                                                       | -2.5            | 0.25                      | 153      | 0.18     |
| Dulude, Bélanger, Wright & Sabourin (2002)   | men                 | CWB            | DAS                                                                         | -1              | 11.74                     | 45       | -0.35    |
| Dulude, Bélanger, Wright & Sabourin (2002)   | men                 | CWB            | DAS                                                                         | -1              | 5.5                       | 45       | -0.32    |
| Dulude, Bélanger, Wright & Sabourin (2002)   | men                 | AWB            | HSC, depression subscale                                                    | -1              | 11.74                     | 45       | 0.10     |
| Dulude, Bélanger, Wright & Sabourin (2002)   | men                 | AWB            | HSC, depression subscale                                                    | -1              | 5.5                       | 45       | 0.12     |
| Dulude, Bélanger, Wright & Sabourin (2002)   | women               | CWB            | DAS                                                                         | -1              | 11.74                     | 45       | -0.40    |
| Dulude, Bélanger, Wright & Sabourin (2002)   | women               | CWB            | DAS                                                                         | -1              | 5.5                       | 45       | -0.21    |
| Dulude, Bélanger, Wright & Sabourin (2002)   | women               | AWB            | HSC, depression subscale                                                    | -1              | 11.74                     | 45       | 0.20     |
| Dulude, Bélanger, Wright & Sabourin (2002)   | women               | AWB            | HSC, depression subscale                                                    | -1              | 5.5                       | 45       | 0.40     |
| Durik, Hyde & Clark (2000)                   |                     | AWB            | CES-D                                                                       | -4.5            | 12                        | 167      | 0.24     |
| Durik, Hyde & Clark (2000)                   |                     | AWB            | CES-D                                                                       | -4.5            | 4                         | 167      | -0.27    |
| Dyrdal & Lucas (2010)                        |                     | CWB            | Single item                                                                 | -0.5            | 30                        | 2840     | -0.13    |
| Dyrdal & Lucas (2010)                        |                     | CWB            | Single item                                                                 | -0.5            | 78                        | 1988     | -0.19    |
| Dyrdal & Lucas (2010)                        |                     | CWB            | Single item                                                                 | -0.5            | 42                        | 2795     | -0.15    |
| Dyrdal & Lucas (2010)                        |                     | CWB            | Single item                                                                 | -0.5            | 18                        | 2840     | 0.00     |
| Dyrdal & Lucas (2010)                        |                     | CWB            | Single item                                                                 | -0.5            | 6                         | 2840     | 0.12     |
| Dyrdal & Lucas (2010)                        |                     | CWB            | Single item                                                                 | -0.5            | 90                        | 1770     | -0.23    |
| Dyrdal & Lucas (2010)                        |                     | CWB            | Single item                                                                 | -0.5            | 54                        | 2535     | -0.20    |
| Dyrdal & Lucas (2010)                        |                     | CWB            | Single item                                                                 | -0.5            | 66                        | 2247     | -0.17    |
| Dyrdal & Lucas (2010)                        |                     | CWB            | Single item                                                                 | -0.5            | 102                       | 1599     | -0.26    |
| Evans, Heron, Francomb, Oke & Golding (2001) |                     | AWB            | EPDS                                                                        | -2              | 8                         | 9028     | 0.30     |
| Evans, Heron, Francomb, Oke & Golding (2001) |                     | AWB            | EPDS                                                                        | -2              | 2                         | 9028     | 0.18     |
| Feeney, Alexander, Noller & Hohaus (2003)    | husbands            | AWB            | Depression Anxiety Stress Scale (DASS; Lovibond & Lovibond, 1995), subscale | -5              | 6                         | 76       | 0.05     |



| <b>Publication</b>                        | <b>Group</b> | <b>AWB/CWB</b> | <b>Scale</b>                                                                | <b>Time lag</b> | <b>Months since event</b> | <b>N</b> | <b>d</b> |
|-------------------------------------------|--------------|----------------|-----------------------------------------------------------------------------|-----------------|---------------------------|----------|----------|
| Feeney, Alexander, Noller & Hohaus (2003) | husbands     | AWB            | Depression Anxiety Stress Scale (DASS; Lovibond & Lovibond, 1995), subscale | -5              | 1.5                       | 92       | 0.02     |
| Feeney, Alexander, Noller & Hohaus (2003) | husbands     | CWB            | Marital Satisfaction Inventory (Snyder, 1979)                               | -5              | 6                         | 76       | -0.31    |
| Feeney, Alexander, Noller & Hohaus (2003) | husbands     | CWB            | Marital Satisfaction Inventory (Snyder, 1979)                               | -5              | 1.5                       | 92       | -0.03    |
| Feeney, Alexander, Noller & Hohaus (2003) | wives        | AWB            | Depression Anxiety Stress Scale (DASS; Lovibond & Lovibond, 1995), subscale | -5              | 6                         | 76       | -0.21    |
| Feeney, Alexander, Noller & Hohaus (2003) | wives        | AWB            | Depression Anxiety Stress Scale (DASS; Lovibond & Lovibond, 1995), subscale | -5              | 1.5                       | 92       | -0.01    |
| Feeney, Alexander, Noller & Hohaus (2003) | wives        | CWB            | Marital Satisfaction Inventory (Snyder, 1979)                               | -5              | 6                         | 76       | -0.48    |
| Feeney, Alexander, Noller & Hohaus (2003) | wives        | CWB            | Marital Satisfaction Inventory (Snyder, 1979)                               | -5              | 1.5                       | 92       | -0.27    |
| Feldman & Nash (1984)                     | men          | CWB            | adapted Satisfaction Scale                                                  | -1.5            | 6                         | 18       | -0.41    |
| Feldman & Nash (1984)                     | men          | AWB            | Self-constructed scale                                                      | -1.5            | 6                         | 18       | 0.32     |
| Feldman & Nash (1984)                     | women        | CWB            | adapted Satisfaction Scale                                                  | -1.5            | 6                         | 24       | -0.87    |

| <b>Publication</b>                        | <b>Group</b>        | <b>AWB/CWB</b> | <b>Scale</b>                     | <b>Time lag</b> | <b>Months since event</b> | <b>N</b> | <b>d</b> |
|-------------------------------------------|---------------------|----------------|----------------------------------|-----------------|---------------------------|----------|----------|
| Feldman & Nash (1984)                     | women               | AWB            | Self-constructed scale           | -1.5            | 6                         | 24       | 0.87     |
| Figueiredo & Costa (2009)                 |                     | AWB            | EPDS                             | -3              | 3                         | 19       | -0.06    |
| Fleming, Ruble, Flett & Van Wagner (1990) |                     | AWB            | Interviews, number of statements | -0.5            | 1                         | 32       | 0.18     |
| Fleming, Ruble, Flett & Van Wagner (1990) |                     | AWB            | Interviews, number of statements | -0.5            | 3                         | 32       | 0.14     |
| Fleming, Ruble, Flett & Van Wagner (1990) |                     | AWB            | Interviews, number of statements | -0.5            | 3                         | 32       | -0.11    |
| Fleming, Ruble, Flett & Van Wagner (1990) |                     | AWB            | Interviews, number of statements | -0.5            | 16                        | 32       | -1.39    |
| Fleming, Ruble, Flett & Van Wagner (1990) |                     | AWB            | Interviews, number of statements | -0.5            | 1                         | 32       | -0.36    |
| Fleming, Ruble, Flett & Van Wagner (1990) |                     | AWB            | Interviews, number of statements | -0.5            | 16                        | 32       | 2.04     |
| Gee & Rhodes (1999)                       | Time 1 after event  | AWB            | SCL-90-R, depression subscale    | 1               | 13                        | 375      | 0.14     |
| Gee & Rhodes (1999)                       | Time 1 before event | AWB            | SCL-90-R, depression subscale    | -3              | 9                         | 244      | 0.34     |
| Gjerdingen & Center (2004)                | fathers             | CWB            | Single item                      | -3              | 6                         | 128      | -0.44    |
| Gjerdingen & Center (2004)                | mothers             | CWB            | Single item                      | -3              | 6                         | 128      | -0.75    |
| Graetch (1990)                            | fathers             | CWB            | DAS                              | -3              | 1.5                       | 109      | 0.07     |
| Graetch (1990)                            | fathers             | AWB            | POMS                             | -3              | 1.5                       | 109      | -0.08    |
| Graetch (1990)                            | mothers             | CWB            | DAS                              | -3              | 1.5                       | 109      | 0.07     |
| Graetch (1990)                            | mothers             | AWB            | POMS                             | -3              | 1.5                       | 109      | 0.31     |
| Graetch (1990)                            | mothers             | AWB            | SCL-90-R, depression subscale    | -3              | 1.5                       | 109      | 0.23     |
| Grote & Bledsoe (2007)                    |                     | AWB            | SCL-90-R, depression subscale    | -4              | 7                         | 179      | 0.04     |
| Grote & Bledsoe (2007)                    |                     | AWB            | SCL-90-R, depression subscale    | -4              | 13.5                      | 179      | 0.10     |
| Grussu, Quatraro & Nasta (2005)           | planned pregnancy   | AWB            | POMS, depression subscale        | -0.5            | 12                        | 88       | -0.37    |
| Grussu, Quatraro & Nasta (2005)           | planned pregnancy   | AWB            | POMS, depression subscale        | -0.5            | 1                         | 88       | -0.47    |

| <b>Publication</b>                              | <b>Group</b>        | <b>AWB/CWB</b> | <b>Scale</b>                                     | <b>Time lag</b> | <b>Months since event</b> | <b>N</b> | <b>d</b> |
|-------------------------------------------------|---------------------|----------------|--------------------------------------------------|-----------------|---------------------------|----------|----------|
| Grussu, Quatraro & Nasta (2005)                 | planned pregnancy   | AWB            | POMS, depression subscale                        | -0.5            | 6                         | 88       | -0.38    |
| Grussu, Quatraro & Nasta (2005)                 | unplanned pregnancy | AWB            | POMS, depression subscale                        | -0.5            | 1                         | 31       | -0.10    |
| Grussu, Quatraro & Nasta (2005)                 | unplanned pregnancy | AWB            | POMS, depression subscale                        | -0.5            | 12                        | 31       | 0.03     |
| Grussu, Quatraro & Nasta (2005)                 | unplanned pregnancy | AWB            | POMS, depression subscale                        | -0.5            | 6                         | 31       | -0.17    |
| Harwood, McLean & Durkin (2007)                 |                     | CWB            | DAS                                              | -1              | 4.5                       | 72       | -0.31    |
| Harwood, McLean & Durkin (2007)                 |                     | AWB            | EPDS                                             | -1              | 4.5                       | 72       | 0.39     |
| Hjelmstedt, Widström, Wramsby & Collins (2004)  | control men         | CWB            | Barnett Scale (Barnett et al., 1993)             | -6              | 6                         | 36       | -0.34    |
| Hjelmstedt, Widström, Wramsby & Collins (2004)  | control women       | CWB            | Barnett Scale (Barnett et al., 1993)             | -6              | 6                         | 40       | -0.86    |
| Hjelmstedt, Widström, Wramsby & Collins (2004)  | IVF men             | CWB            | Barnett Scale (Barnett et al., 1993)             | -6              | 6                         | 53       | -0.50    |
| Hjelmstedt, Widström, Wramsby & Collins (2004)  | IVF women           | CWB            | Barnett Scale (Barnett et al., 1993)             | -6              | 6                         | 55       | -0.52    |
| Hock, Schirtzinger, Lutz & Widaman (1995)       | husbands            | CWB            | Marital comparison level index (Sabatelli, 1984) | -1.5            | 9                         | 142      | -0.36    |
| Hock, Schirtzinger, Lutz & Widaman (1995)       | wives               | AWB            | CES-D                                            | -1.5            | 9                         | 142      | 0.33     |
| Hock, Schirtzinger, Lutz & Widaman (1995)       | wives               | AWB            | CES-D                                            | -1.5            | 1.5                       | 142      | 0.20     |
| Hock, Schirtzinger, Lutz & Widaman (1995)       | wives               | CWB            | Marital comparison level index (Sabatelli, 1984) | -1.5            | 9                         | 142      | -0.38    |
| Holtzman & Glass (1999)                         |                     | CWB            | Single item                                      | -1.5            | 6                         | 217      | -0.69    |
| Johanson, Chapman, Murray, Johnson & Cox (2000) |                     | AWB            | EPDS                                             | -3              | 3                         | 417      | 0.25     |
| Jurcovicová & Válkyová (1998)                   | adolescents         | AWB            | EPDS                                             | -5              | 1.5                       | 153      | 0.19     |
| Jurcovicová & Válkyová (1998)                   | adults              | AWB            | EPDS                                             | -5              | 1.5                       | 843      | -0.05    |

| <b>Publication</b>                   | <b>Group</b> | <b>AWB/CWB</b> | <b>Scale</b>                               | <b>Time lag</b> | <b>Months since event</b> | <b><i>N</i></b> | <b><i>d</i></b> |
|--------------------------------------|--------------|----------------|--------------------------------------------|-----------------|---------------------------|-----------------|-----------------|
| Kaitz & Katzir (2004)                | fathers      | AWB            | Expression of negative affect in interview | -0.5            | 3                         | 55              | -0.13           |
| Kaitz & Katzir (2004)                | fathers      | AWB            | Expression of negative affect in interview | -0.5            | 6                         | 50              | 0.08            |
| Kaitz & Katzir (2004)                | fathers      | AWB            | Expression of negative affect in interview | -0.5            | 12                        | 32              | 0.11            |
| Kaitz & Katzir (2004)                | fathers      | AWB            | Expression of positive affect in interview | -0.5            | 12                        | 32              | 0.38            |
| Kaitz & Katzir (2004)                | fathers      | AWB            | Expression of positive affect in interview | -0.5            | 6                         | 50              | 0.64            |
| Kaitz & Katzir (2004)                | fathers      | AWB            | Expression of positive affect in interview | -0.5            | 3                         | 55              | 0.75            |
| Kaitz & Katzir (2004)                | mothers      | AWB            | Expression of negative affect in interview | -0.5            | 12                        | 32              | -0.26           |
| Kaitz & Katzir (2004)                | mothers      | AWB            | Expression of negative affect in interview | -0.5            | 6                         | 50              | -0.80           |
| Kaitz & Katzir (2004)                | mothers      | AWB            | Expression of negative affect in interview | -0.5            | 3                         | 55              | -0.29           |
| Kaitz & Katzir (2004)                | mothers      | AWB            | Expression of positive affect in interview | -0.5            | 12                        | 32              | 0.51            |
| Kaitz & Katzir (2004)                | mothers      | AWB            | Expression of positive affect in interview | -0.5            | 6                         | 50              | 0.74            |
| Kaitz & Katzir (2004)                | mothers      | AWB            | Expression of positive affect in interview | -0.5            | 3                         | 55              | 0.80            |
| Keeton, Perry-Jenkins & Sayer (2008) | fathers      | AWB            | CES-D                                      | -0.96           | 4.57                      | 132             | 0.01            |
| Keeton, Perry-Jenkins & Sayer (2008) | fathers      | AWB            | CES-D                                      | -0.96           | 6.68                      | 132             | -0.02           |

| <b>Publication</b>                                 | <b>Group</b> | <b>AWB/CWB</b> | <b>Scale</b>                                                          | <b>Time lag</b> | <b>Months since event</b> | <b><i>N</i></b> | <b><i>d</i></b> |
|----------------------------------------------------|--------------|----------------|-----------------------------------------------------------------------|-----------------|---------------------------|-----------------|-----------------|
| Keeton, Perry-Jenkins & Sayer (2008)               | fathers      | AWB            | CES-D                                                                 | -0.96           | 12.81                     | 132             | 0.09            |
| Keeton, Perry-Jenkins & Sayer (2008)               | fathers      | AWB            | CES-D                                                                 | -0.96           | 1.3                       | 132             | -0.01           |
| Keeton, Perry-Jenkins & Sayer (2008)               | mothers      | AWB            | CES-D                                                                 | -0.96           | 4.57                      | 133             | 0.40            |
| Keeton, Perry-Jenkins & Sayer (2008)               | mothers      | AWB            | CES-D                                                                 | -0.96           | 6.68                      | 133             | 0.38            |
| Keeton, Perry-Jenkins & Sayer (2008)               | mothers      | AWB            | CES-D                                                                 | -0.96           | 12.81                     | 133             | 0.41            |
| Keeton, Perry-Jenkins & Sayer (2008)               | mothers      | AWB            | CES-D                                                                 | -0.96           | 1.3                       | 133             | 0.42            |
| Klennert, Gavin, Wamboldt & Mrazek (1992)          | husbands     | CWB            | DAS                                                                   | -1.5            | 12                        | 128             | -0.28           |
| Klennert, Gavin, Wamboldt & Mrazek (1992)          | husbands     | CWB            | DAS                                                                   | -1.5            | 18                        | 128             | -0.40           |
| Klennert, Gavin, Wamboldt & Mrazek (1992)          | husbands     | CWB            | DAS                                                                   | -1.5            | 6                         | 128             | -0.21           |
| Klennert, Gavin, Wamboldt & Mrazek (1992)          | wives        | CWB            | DAS                                                                   | -1.5            | 6                         | 128             | -0.30           |
| Klennert, Gavin, Wamboldt & Mrazek (1992)          | wives        | CWB            | DAS                                                                   | -1.5            | 12                        | 128             | -0.36           |
| Klennert, Gavin, Wamboldt & Mrazek (1992)          | wives        | CWB            | DAS                                                                   | -1.5            | 18                        | 128             | -0.51           |
| Kluwer & Johnson (2007)                            | fathers      | CWB            | Self-constructed scale                                                | -2.5            | 6                         | 290             | -0.32           |
| Kluwer & Johnson (2007)                            | fathers      | CWB            | Self-constructed scale                                                | -2.5            | 15                        | 290             | -0.64           |
| Kluwer & Johnson (2007)                            | fathers      | CWB            | Self-constructed scale                                                | -2.5            | 48                        | 108             | -0.96           |
| Kluwer & Johnson (2007)                            | mothers      | CWB            | Self-constructed scale                                                | -2.5            | 6                         | 291             | -0.41           |
| Kluwer & Johnson (2007)                            | mothers      | CWB            | Self-constructed scale                                                | -2.5            | 48                        | 107             | -1.07           |
| Kluwer & Johnson (2007)                            | mothers      | CWB            | Self-constructed scale                                                | -2.5            | 15                        | 288             | -0.74           |
| Laizner & Jeans (1990)                             |              | AWB            | Multiple Affect Adjective Check List (MAACL; Zuckerman & Lubin, 1965) | -1.5            | 0.1                       | 27              | -0.71           |
| Lawrence, Rothman, Cobb, Rothman & Bradbury (2008) | husbands     | CWB            | QMI                                                                   | -1              | 6                         | 104             | -0.26           |

| <b>Publication</b>                                 | <b>Group</b>        | <b>AWB/CWB</b> | <b>Scale</b>                                                              | <b>Time lag</b> | <b>Months since event</b> | <b>N</b> | <b>d</b> |
|----------------------------------------------------|---------------------|----------------|---------------------------------------------------------------------------|-----------------|---------------------------|----------|----------|
| Lawrence, Rothman, Cobb, Rothman & Bradbury (2008) | husbands            | CWB            | QMI                                                                       | -1              | 12                        | 104      | -0.50    |
| Lawrence, Rothman, Cobb, Rothman & Bradbury (2008) | wives               | CWB            | QMI                                                                       | -1              | 12                        | 104      | -0.55    |
| Lawrence, Rothman, Cobb, Rothman & Bradbury (2008) | wives               | CWB            | QMI                                                                       | -1              | 6                         | 104      | -0.42    |
| Lee & Doherty (2007)                               |                     | CWB            | DAS                                                                       | -4.5            | 12                        | 141      | -0.24    |
| Lee & Doherty (2007)                               |                     | CWB            | DAS                                                                       | -4.5            | 6                         | 141      | -0.09    |
| Lee & Gramotnev (2007)                             |                     | AWB            | CES-D                                                                     | -18             | 18                        | 1079     | 0.02     |
| Lee & Gramotnev (2007)                             |                     | CWB            | Self-constructed scale                                                    | -18             | 18                        | 1079     | -0.05    |
| Levy-Schiff (1994)                                 | men                 | CWB            | MAT                                                                       | -2              | 8.5                       | 102      | -0.23    |
| Levy-Schiff (1994)                                 | women               | CWB            | MAT                                                                       | -2              | 8.5                       | 102      | -0.46    |
| Lewis & Cooper (1988)                              | dual earner fathers | AWB            | Crown Crisp Experiential Index (Crown & Crisp, 1979), depression subscale | -1              | 5                         | 26       | -0.24    |
| Lewis & Cooper (1988)                              | dual earner fathers | CWB            | Job dissatisfaction scale (Davidson & Cooper, 1983)                       | -1              | 5                         | 26       | -0.05    |
| Lewis & Cooper (1988)                              | dual earner fathers | CWB            | Life Dissatisfaction Scale (adapted from Warr et al., 1979)               | -1              | 5                         | 26       | -0.11    |
| Lewis & Cooper (1988)                              | dual earner mothers | AWB            | Crown Crisp Experiential Index (Crown & Crisp, 1979), depression subscale | -1              | 5                         | 26       | 0.05     |
| Lewis & Cooper (1988)                              | dual earner mothers | CWB            | Job dissatisfaction scale (Davidson & Cooper, 1983)                       | -1              | 5                         | 26       | 0.10     |
| Lewis & Cooper (1988)                              | dual earner mothers | CWB            | Life Dissatisfaction Scale (adapted from Warr et al., 1979)               | -1              | 5                         | 26       | -0.81    |

| Publication                         | Group                 | AWB/CWB | Scale                                                                     | Time lag | Months since event | <i>N</i> | <i>d</i> |
|-------------------------------------|-----------------------|---------|---------------------------------------------------------------------------|----------|--------------------|----------|----------|
| Lewis & Cooper (1988)               | single earner fathers | AWB     | Crown Crisp Experiential Index (Crown & Crisp, 1979), depression subscale | -1       | 5                  | 15       | -0.29    |
| Lewis & Cooper (1988)               | single earner fathers | CWB     | Job dissatisfaction scale (Davidson & Cooper, 1983)                       | -1       | 5                  | 15       | 0.40     |
| Lewis & Cooper (1988)               | single earner fathers | CWB     | Life Dissatisfaction Scale (adapted from Warr et al., 1979)               | -1       | 5                  | 15       | -1.24    |
| Lewis & Cooper (1988)               | single earner mothers | AWB     | Crown Crisp Experiential Index (Crown & Crisp, 1979), depression subscale | -1       | 5                  | 15       | -0.10    |
| Lewis & Cooper (1988)               | single earner mothers | CWB     | Life Dissatisfaction Scale (adapted from Warr et al., 1979)               | -1       | 5                  | 15       | -1.14    |
| Limlomwongse & Liabsuetrakul (2006) |                       | AWB     | EPDS                                                                      | -0.5     | 2                  | 525      | 0.16     |
| Lu (2006)                           | fathers               | CWB     | Single item                                                               | -1.5     | 1.5                | 114      | -0.22    |
| Lu (2006)                           | mothers               | CWB     | Single item                                                               | -1.5     | 1.5                | 114      | -0.23    |
| Meijer & van den Wittenboer (2007)  | fathers               | CWB     | Scale by Lange (1983)                                                     | -0.5     | 12                 | 78       | -0.50    |
| Meijer & van den Wittenboer (2007)  | fathers               | CWB     | Scale by Lange (1983)                                                     | -0.5     | 1.75               | 73       | -0.14    |
| Meijer & van den Wittenboer (2007)  | mothers               | CWB     | Scale by Lange (1983)                                                     | -0.5     | 12                 | 84       | -0.78    |
| Meijer & van den Wittenboer (2007)  | mothers               | CWB     | Scale by Lange (1983)                                                     | -0.5     | 1.75               | 83       | -0.20    |
| Moore (2003)                        | fathers               | CWB     | Quality of Relationship Inventory (QRI; Pierce, Sarason, & Sarason, 1991) | -3       | 12                 | 129      | -0.32    |

| <b>Publication</b>                                    | <b>Group</b> | <b>AWB/CWB</b> | <b>Scale</b>                                                              | <b>Time lag</b> | <b>Months since event</b> | <b>N</b> | <b>d</b> |
|-------------------------------------------------------|--------------|----------------|---------------------------------------------------------------------------|-----------------|---------------------------|----------|----------|
| Moore (2003)                                          | mothers      | CWB            | Quality of Relationship Inventory (QRI; Pierce, Sarason, & Sarason, 1991) | -3              | 12                        | 129      | -0.69    |
| O'Hara, Zekoski, Philipps & Wright (1990)             |              | CWB            | DAS                                                                       | -1              | 2.25                      | 182      | -0.10    |
| Pancer, Pratt, Hunsberger & Gallant (2000)            | fathers      | AWB            | CES-D                                                                     | -3              | 6                         | 69       | -0.13    |
| Pancer, Pratt, Hunsberger & Gallant (2000)            | fathers      | CWB            | MAT                                                                       | -3              | 6                         | 69       | -0.31    |
| Pancer, Pratt, Hunsberger & Gallant (2000)            | mothers      | AWB            | CES-D                                                                     | -3              | 6                         | 69       | -0.03    |
| Pancer, Pratt, Hunsberger & Gallant (2000)            | mothers      | CWB            | MAT                                                                       | -3              | 6                         | 69       | -0.68    |
| Perren, von Wyl, Bürgin, Simoni & von Klitzing (2005) | fathers      | AWB            | EPDS                                                                      | -4              | 12                        | 51       | 0.77     |
| Perren, von Wyl, Bürgin, Simoni & von Klitzing (2005) | fathers      | AWB            | EPDS                                                                      | -4              | 18                        | 40       | 1.03     |
| Perren, von Wyl, Bürgin, Simoni & von Klitzing (2005) | fathers      | AWB            | EPDS                                                                      | -4              | 1                         | 49       | 0.17     |
| Perren, von Wyl, Bürgin, Simoni & von Klitzing (2005) | fathers      | AWB            | EPDS                                                                      | -4              | 3                         | 52       | 0.19     |
| Perren, von Wyl, Bürgin, Simoni & von Klitzing (2005) | fathers      | CWB            | Partnership Questionnaire (PFB; Hahlweg, 1996)                            | -4.5            | 12                        | 46       | -0.73    |
| Perren, von Wyl, Bürgin, Simoni & von Klitzing (2005) | mothers      | AWB            | EPDS                                                                      | -4              | 18                        | 60       | 0.71     |
| Perren, von Wyl, Bürgin, Simoni & von Klitzing (2005) | mothers      | AWB            | EPDS                                                                      | -4              | 12                        | 72       | 0.49     |
| Perren, von Wyl, Bürgin, Simoni & von Klitzing (2005) | mothers      | AWB            | EPDS                                                                      | -4              | 3                         | 73       | 0.28     |
| Perren, von Wyl, Bürgin, Simoni & von Klitzing (2005) | mothers      | AWB            | EPDS                                                                      | -4              | 1                         | 66       | 0.07     |
| Perren, von Wyl, Bürgin, Simoni & von Klitzing (2005) | mothers      | CWB            | Partnership Questionnaire (PFB; Hahlweg, 1996)                            | -4.5            | 12                        | 54       | -1.02    |



| Publication                                            | Group    | AWB/CWB | Scale                                                  | Time lag | Months since event | <i>N</i> | <i>d</i> |
|--------------------------------------------------------|----------|---------|--------------------------------------------------------|----------|--------------------|----------|----------|
| Porter & Hsu (2003)                                    |          | CWB     | Marital quality questionnaire (Braiker & Kelley, 1979) | -2       | 3                  | 50       | -0.37    |
| Porter & Hsu (2003)                                    |          | CWB     | Marital quality questionnaire (Braiker & Kelley, 1979) | -2       | 3                  | 50       | -0.12    |
| Porter & Hsu (2003)                                    |          | CWB     | Marital quality questionnaire (Braiker & Kelley, 1979) | -2       | 1                  | 52       | -0.12    |
| Porter & Hsu (2003)                                    |          | CWB     | Marital quality questionnaire (Braiker & Kelley, 1979) | -2       | 1                  | 52       | -0.29    |
| Post (1998)                                            |          | AWB     | Current Feelings Scale (Ruble et al., 1990)            | -3       | 3.5                | 50       | 1.83     |
| Priel & Besser (2002)                                  |          | AWB     | CES-D                                                  | -1       | 2                  | 120      | -0.14    |
| Quadagno, Dixon, Denney & Buck (1986)                  |          | AWB     | Single item                                            | -3       | 6                  | 42       | 0.22     |
| Quadagno, Dixon, Denney & Buck (1986)                  |          | AWB     | Single item                                            | -3       | 0.01               | 42       | 0.88     |
| Rholes, Simpson, Campbell & Grich (2001)               | husbands | CWB     | DAS, satisfaction subscale                             | -1.5     | 6                  | 106      | -0.42    |
| Rholes, Simpson, Campbell & Grich (2001)               | wives    | CWB     | DAS, satisfaction subscale                             | -1.5     | 6                  | 106      | -0.52    |
| Rotman (2006)                                          | fathers  | AWB     | CES-D                                                  | -1.5     | 3                  | 101      | 0.30     |
| Rotman (2006)                                          | fathers  | AWB     | CES-D                                                  | -1.5     | 12                 | 32       | 0.23     |
| Rotman (2006)                                          | fathers  | AWB     | CES-D                                                  | -1.5     | 30                 | 18       | 0.26     |
| Rotman (2006)                                          | fathers  | CWB     | MAT                                                    | -1.5     | 30                 | 26       | -0.47    |
| Rotman (2006)                                          | fathers  | CWB     | MAT                                                    | -1.5     | 12                 | 38       | -0.51    |
| Rotman (2006)                                          | fathers  | CWB     | MAT                                                    | -1.5     | 3                  | 117      | -0.18    |
| Rotman (2006)                                          | mothers  | AWB     | CES-D                                                  | -1.5     | 30                 | 23       | 0.35     |
| Rotman (2006)                                          | mothers  | AWB     | CES-D                                                  | -1.5     | 12                 | 37       | 0.36     |
| Rotman (2006)                                          | mothers  | AWB     | CES-D                                                  | -1.5     | 3                  | 108      | 0.39     |
| Rotman (2006)                                          | mothers  | CWB     | MAT                                                    | -1.5     | 3                  | 120      | -0.13    |
| Rotman (2006)                                          | mothers  | CWB     | MAT                                                    | -1.5     | 30                 | 27       | -0.64    |
| Rotman (2006)                                          | mothers  | CWB     | MAT                                                    | -1.5     | 12                 | 44       | -0.59    |
| Salmela-Aro, Aunola, Saisto, Halmesmäki & Nurmi (2006) |          | CWB     | DAS                                                    | -1       | 24                 | 314      | -0.40    |

| Publication                                             | Group    | AWB/CWB | Scale                         | Time lag | Months since event | <i>N</i> | <i>d</i> |
|---------------------------------------------------------|----------|---------|-------------------------------|----------|--------------------|----------|----------|
| Salmela-Aro, Aunola, Saisto, Halmesmäki & Nurmi (2006)  |          | CWB     | DAS                           | -1       | 3                  | 314      | 0.00     |
| Seimyr, Edhborg, Lundhand, Sjögren (2004)               |          | AWB     | EPDS                          | -2       | 12                 | 235      | 0.38     |
| Seimyr, Edhborg, Lundhand, Sjögren (2004)               |          | AWB     | EPDS                          | -2       | 2                  | 326      | 0.17     |
| Sieber, Germann, Barbir & Ehlert (2006)                 |          | AWB     | SCL-90-R, depression subscale | -3       | 13                 | 58       | 0.02     |
| Soliday, McCluskey-Fawcett & O'Brien (1999)             | fathers  | AWB     | CES-D                         | -1       | 1                  | 51       | 0.08     |
| Soliday, McCluskey-Fawcett & O'Brien (1999)             | fathers  | CWB     | DAS, short form               | -1       | 1                  | 51       | 0.11     |
| Soliday, McCluskey-Fawcett & O'Brien (1999)             | fathers  | AWB     | PANAS, NA                     | -1       | 1                  | 51       | 0.01     |
| Soliday, McCluskey-Fawcett & O'Brien (1999)             | fathers  | AWB     | PANAS, PA                     | -1       | 1                  | 51       | 0.30     |
| Soliday, McCluskey-Fawcett & O'Brien (1999)             | mothers  | AWB     | CES-D                         | -1       | 1                  | 51       | -0.40    |
| Soliday, McCluskey-Fawcett & O'Brien (1999)             | mothers  | CWB     | DAS, short form               | -1       | 1                  | 51       | 0.00     |
| Soliday, McCluskey-Fawcett & O'Brien (1999)             | mothers  | AWB     | PANAS, NA                     | -1       | 1                  | 51       | -0.57    |
| Soliday, McCluskey-Fawcett & O'Brien (1999)             | mothers  | AWB     | PANAS, PA                     | -1       | 1                  | 51       | -0.02    |
| Strauss & Goldberg (1999)                               |          | AWB     | CES-D                         | -1.5     | 13.19              | 39       | -0.03    |
| Tucker & Aron (1993)                                    | husbands | CWB     | MOQ                           | -1.9     | 8.3                | 25       | -0.29    |
| Tucker & Aron (1993)                                    | wives    | CWB     | MOQ                           | -1.9     | 8.3                | 25       | -0.26    |
| Wright, Henggeler & Craig (1986)                        | husbands | CWB     | DAS, satisfaction subscale    | -2       | 3.5                | 41       | -0.05    |
| Wright, Henggeler & Craig (1986)                        | wives    | CWB     | DAS, satisfaction subscale    | -2       | 3.5                | 41       | -0.11    |
| Yong-Ku, Ji-Won, Kye-Hyun, Kang-Sub & Young-Chul (2008) |          | AWB     | EPDS                          | -4       | 1.5                | 60       | 0.27     |
| Yong-Ku, Ji-Won, Kye-Hyun, Kang-Sub & Young-Chul (2008) |          | AWB     | EPDS                          | -4       | 0.25               | 60       | -0.04    |
| Zelkowitz, Saucier, Wang, et al. (2008)                 |          | AWB     | EPDS                          | -3       | 2                  | 106      | 0.01     |
| Zelkowitz, Saucier, Wang, et al. (2008)                 |          | CWB     | DAS                           | -3       | 2                  | 106      | -0.12    |

Notes. AWB = affective well-being. CWB = cognitive well-being. Time lag = time between baseline and event in months. *N* = sample size. *d* = bias-corrected standardized mean change. The abbreviations for the scales are listed in Table 5.

Table 13. Post-hoc effect sizes for child birth.

| Publication                                              | Group                 | AWB/CWB | Scale | Time lag | Months since event | N   | d     |
|----------------------------------------------------------|-----------------------|---------|-------|----------|--------------------|-----|-------|
| Ahlborg, Misvaer & Möller (2009)                         | with add. Child       | CWB     | DAS   | 6        | 48                 | 253 | -0.48 |
| Ahlborg, Misvaer & Möller (2009)                         | without add. Child    | CWB     | DAS   | 6        | 48                 | 51  | -0.44 |
| Ahn (2001)                                               |                       | AWB     | MHI   | 0.045    | 1.5                | 152 | -0.23 |
| Ahn (2001)                                               |                       | AWB     | MHI   | 0.045    | 3                  | 131 | 0.00  |
| Beeghly, Weinberg, Olson, Kernan, Riley & Tronick (2002) |                       | AWB     | CES-D | 2        | 3                  | 106 | 0.39  |
| Beeghly, Weinberg, Olson, Kernan, Riley & Tronick (2002) |                       | AWB     | CES-D | 2        | 3                  | 163 | -0.11 |
| Beeghly, Weinberg, Olson, Kernan, Riley & Tronick (2002) |                       | AWB     | CES-D | 2        | 6                  | 106 | 0.37  |
| Beeghly, Weinberg, Olson, Kernan, Riley & Tronick (2002) |                       | AWB     | CES-D | 2        | 6                  | 163 | -0.01 |
| Beeghly, Weinberg, Olson, Kernan, Riley & Tronick (2002) |                       | AWB     | CES-D | 2        | 12                 | 106 | 0.48  |
| Beeghly, Weinberg, Olson, Kernan, Riley & Tronick (2002) |                       | AWB     | CES-D | 2        | 12                 | 163 | 0.01  |
| Beeghly, Weinberg, Olson, Kernan, Riley & Tronick (2002) |                       | AWB     | CES-D | 2        | 18                 | 163 | -0.13 |
| Boyce, Hickie & Parker (1991)                            |                       | AWB     | EPDS  | -1       | 3                  | 128 | 0.18  |
| Boyce, Hickie & Parker (1991)                            |                       | AWB     | EPDS  | -1       | 6                  | 140 | 0.33  |
| Broom (1998)                                             | dual-earner fathers   | AWB     | ABS   | 3        | 30                 | 19  | -0.46 |
| Broom (1998)                                             | dual-earner fathers   | CWB     | QMI   | 3        | 30                 | 19  | -0.74 |
| Broom (1998)                                             | dual-earner mothers   | AWB     | ABS   | 3        | 30                 | 19  | -0.16 |
| Broom (1998)                                             | dual-earner mothers   | CWB     | QMI   | 3        | 30                 | 19  | -1.04 |
| Broom (1998)                                             | single-earner fathers | AWB     | ABS   | 3        | 30                 | 21  | 0.09  |
| Broom (1998)                                             | single-earner fathers | CWB     | QMI   | 3        | 30                 | 21  | -1.06 |
| Broom (1998)                                             | single-earner mothers | AWB     | ABS   | 3        | 30                 | 21  | 0.31  |
| Broom (1998)                                             | single-earner mothers | CWB     | QMI   | 3        | 30                 | 21  | -0.99 |
| Dagher (2008)                                            |                       | AWB     | EPDS  | 1.5      | 3                  | 638 | 0.17  |

| Publication                                      | Group            | AWB/CWB | Scale                    | Time lag | Months since event | <i>N</i> | <i>d</i> |
|--------------------------------------------------|------------------|---------|--------------------------|----------|--------------------|----------|----------|
| Dagher (2008)                                    |                  | AWB     | EPDS                     | 1.5      | 6                  | 603      | 0.17     |
| Dagher (2008)                                    |                  | AWB     | EPDS                     | 1.5      | 12                 | 544      | 0.21     |
| Finello, Litton, deLemos & Chan (1998)           |                  | AWB     | CES-D                    | 1        | 12                 | 63       | -0.11    |
| Gameiro, Moura-Ramos & Canavarro (2009)          | multiparous      | AWB     | BSI, depression subscale | 0.1      | 8                  | 26       | 0.50     |
| Gameiro, Moura-Ramos & Canavarro (2009)          | multiparous      | AWB     | Visual analogue scale    | 0.1      | 8                  | 19       | -0.85    |
| Gameiro, Moura-Ramos & Canavarro (2009)          | primiparous      | AWB     | BSI, depression subscale | 0.1      | 8                  | 26       | 0.11     |
| Gameiro, Moura-Ramos & Canavarro (2009)          | primiparous      | AWB     | Visual analogue scale    | 0.1      | 8                  | 19       | 0.09     |
| Hayes (2003)                                     | female           | CWB     | DAS                      | 3        | 5                  | 22       | 0.03     |
| Hayes (2003)                                     | female           | CWB     | DAS                      | 3        | 7                  | 22       | -0.04    |
| Hayes (2003)                                     | female           | CWB     | DAS                      | 3        | 9                  | 22       | 0.13     |
| Hayes (2003)                                     | female           | AWB     | PANAS, PA                | 3        | 5                  | 22       | 0.12     |
| Hayes (2003)                                     | female           | AWB     | PANAS, PA                | 3        | 7                  | 22       | 0.16     |
| Hayes (2003)                                     | female           | AWB     | PANAS, PA                | 3        | 9                  | 22       | 0.15     |
| Hayes (2003)                                     | male             | CWB     | DAS                      | 3        | 5                  | 22       | -0.11    |
| Hayes (2003)                                     | male             | CWB     | DAS                      | 3        | 7                  | 22       | 0.01     |
| Hayes (2003)                                     | male             | CWB     | DAS                      | 3        | 9                  | 22       | 0.06     |
| Hayes (2003)                                     | male             | AWB     | PANAS, PA                | 3        | 5                  | 21       | 0.25     |
| Hayes (2003)                                     | male             | AWB     | PANAS, PA                | 3        | 7                  | 21       | -0.02    |
| Hayes (2003)                                     | male             | AWB     | PANAS, PA                | 3        | 9                  | 21       | 0.14     |
| Hobfoll & Leiberman (1987)                       | caesarian birth  | AWB     | CES-D, short version     | 0.02     | 3                  | 22       | 0.88     |
| Hobfoll & Leiberman (1987)                       | normal birth     | AWB     | CES-D, short version     | 0.02     | 3                  | 24       | 0.18     |
| Hobfoll & Leiberman (1987)                       | premature birth  | AWB     | CES-D, short version     | 0.02     | 3                  | 28       | 0.09     |
| Kermode, Fisher & Jolley (2000)                  | private patients | AWB     | POMS                     | -1.5     | 2                  | 159      | 0.26     |
| Kermode, Fisher & Jolley (2000)                  | private patients | AWB     | POMS                     | -1.5     | 8                  | 159      | 0.13     |
| Kermode, Fisher & Jolley (2000)                  | public patients  | AWB     | POMS                     | -1.5     | 2                  | 132      | 0.27     |
| Kermode, Fisher & Jolley (2000)                  | public patients  | AWB     | POMS                     | -1.5     | 8                  | 132      | 0.03     |
| Levitt, Coffman, Guacci-Franco & Loveless (1993) |                  | CWB     | Self-constructed scale   | 1        | 13                 | 43       | -0.63    |
| Lu (2004)                                        | fathers          | CWB     | Single item              | 1.5      | 6                  | 90       | 0.19     |
| Lu (2004)                                        | mothers          | CWB     | Single item              | 1.5      | 6                  | 90       | -0.04    |

| <b>Publication</b>                     | <b>Group</b>                            | <b>AWB/CWB</b> | <b>Scale</b>             | <b>Time lag</b> | <b>Months since event</b> | <b><i>N</i></b> | <b><i>d</i></b> |
|----------------------------------------|-----------------------------------------|----------------|--------------------------|-----------------|---------------------------|-----------------|-----------------|
| McKenry, Browne, Kotch & Symons (1990) |                                         | AWB            | CES-D                    | 1               | 12                        | 157             | 0.19            |
| Pridham, Lin & Brown (2001)            | BPD History                             | AWB            | CES-D                    | 1               | 4                         | 31              | -0.08           |
| Pridham, Lin & Brown (2001)            | BPD History                             | AWB            | CES-D                    | 1               | 8                         | 31              | -0.02           |
| Pridham, Lin & Brown (2001)            | BPD History                             | AWB            | CES-D                    | 1               | 12                        | 31              | -0.24           |
| Pridham, Lin & Brown (2001)            | Healthy Term                            | AWB            | CES-D                    | 1               | 4                         | 49              | 0.12            |
| Pridham, Lin & Brown (2001)            | Healthy Term                            | AWB            | CES-D                    | 1               | 8                         | 49              | 0.10            |
| Pridham, Lin & Brown (2001)            | Healthy Term                            | AWB            | CES-D                    | 1               | 12                        | 49              | 0.17            |
| Pridham, Lin & Brown (2001)            | RDS History                             | AWB            | CES-D                    | 1               | 4                         | 23              | 0.04            |
| Pridham, Lin & Brown (2001)            | RDS History                             | AWB            | CES-D                    | 1               | 8                         | 23              | -0.04           |
| Pridham, Lin & Brown (2001)            | RDS History                             | AWB            | CES-D                    | 1               | 12                        | 23              | 0.32            |
| Singer et al. (1999)                   | Infants with Bronchopulmonary dysplasia | AWB            | BSI, depression subscale | 1               | 8                         | 64              | 0.37            |
| Singer et al. (1999)                   | Infants with Bronchopulmonary dysplasia | AWB            | BSI, depression subscale | 1               | 12                        | 64              | 0.38            |
| Singer et al. (1999)                   | Infants with Bronchopulmonary dysplasia | AWB            | BSI, depression subscale | 1               | 24                        | 64              | 0.26            |
| Singer et al. (1999)                   | Infants with Bronchopulmonary dysplasia | AWB            | BSI, depression subscale | 1               | 36                        | 64              | 0.30            |
| Singer et al. (1999)                   | infants with VLBW                       | AWB            | BSI, depression subscale | 1               | 8                         | 33              | 0.29            |
| Singer et al. (1999)                   | infants with VLBW                       | AWB            | BSI, depression subscale | 1               | 12                        | 33              | 0.26            |
| Singer et al. (1999)                   | infants with VLBW                       | AWB            | BSI, depression subscale | 1               | 24                        | 33              | 0.38            |
| Singer et al. (1999)                   | infants with VLBW                       | AWB            | BSI, depression subscale | 1               | 36                        | 33              | 0.31            |
| Singer et al. (1999)                   | Term                                    | AWB            | BSI, depression subscale | 1               | 8                         | 87              | 0.01            |

| Publication                                | Group                  | AWB/CWB | Scale                                                  | Time lag | Months since event | <i>N</i> | <i>d</i> |
|--------------------------------------------|------------------------|---------|--------------------------------------------------------|----------|--------------------|----------|----------|
| Singer et al. (1999)                       | Term                   | AWB     | BSI, depression subscale                               | 1        | 12                 | 89       | 0.07     |
| Singer et al. (1999)                       | Term                   | AWB     | BSI, depression subscale                               | 1        | 24                 | 79       | 0.10     |
| Singer et al. (1999)                       | Term                   | AWB     | BSI, depression subscale                               | 1        | 36                 | 80       | -0.04    |
| Slade, Emerson & Freedlander (1999)        | early cleft lip repair | AWB     | EPDS                                                   | 0.5      | 3                  | 18       | 0.19     |
| Slade, Emerson & Freedlander (1999)        | early cleft lip repair | AWB     | EPDS                                                   | 0.5      | 6                  | 19       | 0.46     |
| Slade, Emerson & Freedlander (1999)        | late cleft lip repair  | AWB     | EPDS                                                   | 0.5      | 3                  | 9        | 0.66     |
| Slade, Emerson & Freedlander (1999)        | late cleft lip repair  | AWB     | EPDS                                                   | 0.5      | 6                  | 9        | 0.67     |
| Uguz, Kaya, Sahingoz, Cilli & Akman (2008) |                        | AWB     | EPDS                                                   | 1.5      | 12                 | 34       | 2.44     |
| Van der Wal (2001)                         | fathers                | CWB     | DAS                                                    | 4        | 7                  | 9        | -0.16    |
| Van der Wal (2001)                         | mothers                | CWB     | DAS                                                    | 4        | 7                  | 11       | 0.14     |
| White, Matthey, Boyd & Barnett (2006)      |                        | AWB     | EPDS                                                   | 1.5      | 6                  | 275      | 0.08     |
| White, Matthey, Boyd & Barnett (2006)      |                        | AWB     | EPDS                                                   | 1.5      | 12                 | 258      | 0.13     |
| Wicki (1999)                               | husbands               | AWB     | Adaptation of a well-being scale by Grob et al. (1991) | 4        | 16                 | 164      | -0.19    |
| Wicki (1999)                               | wives                  | AWB     | Adaptation of a well-being scale by Grob et al. (1991) | 4        | 16                 | 164      | -0.19    |

*Notes.* AWB = affective well-being. CWB = cognitive well-being. Time lag = time between baseline and event in months. *N* = sample size. *d* = bias-corrected standardized mean change. The abbreviations for the scales are listed in Table 5.

Table 14. Prospective effect sizes for unemployment.

| Publication                              | Group                | AWB/CWB | Scale                  | Time lag | Months since event | N    | d     |
|------------------------------------------|----------------------|---------|------------------------|----------|--------------------|------|-------|
| Ali & Avison (1997)                      | married mothers      | AWB     | CES-D                  | -9       | 9                  | 32   | 0.09  |
| Ali & Avison (1997)                      | single mothers       | AWB     | CES-D                  | -9       | 9                  | 38   | -0.03 |
| Donovan, Oddy, Pardoe & Ades (1986)      | female               | AWB     | GHQ                    | -2       | 7                  | 14   | -0.10 |
| Donovan, Oddy, Pardoe & Ades (1986)      | male                 | AWB     | GHQ                    | -2       | 7                  | 26   | -0.45 |
| Gallo et al. (2006)                      |                      | AWB     | CES-D, short form      | -12      | 12                 | 231  | 0.00  |
| Gallo et al. (2006)                      |                      | AWB     | CES-D, short form      | -12      | 36                 | 231  | 0.04  |
| Gallo et al. (2006)                      |                      | AWB     | CES-D, short form      | -12      | 60                 | 231  | -0.18 |
| Ginexi, Howe & Caplan (2000)             |                      | AWB     | CES-D                  | -3.4     | 3.4                | 19   | 0.00  |
| Isaksson (1990)                          |                      | AWB     | GHQ                    | -6       | 6                  | 9    | -1.09 |
| Jackson, Stafford, Banks & Warr (1983)   | first cohort t1 + t2 | AWB     | GHQ                    | -4       | 4                  | 27   | -0.43 |
| Jackson, Stafford, Banks & Warr (1983)   | first cohort t2 + t3 | AWB     | GHQ                    | -7.5     | 7.5                | 58   | -0.94 |
| Jackson, Stafford, Banks & Warr (1983)   | second cohort        | AWB     | GHQ                    | -8       | 8                  | 60   | -0.66 |
| Levi et al. (1984)                       |                      | AWB     | GHQ                    | -1       | 1                  | 70   | -0.37 |
| Levi et al. (1984)                       |                      | AWB     | GHQ                    | -1       | 3                  | 70   | -0.19 |
| Lee & Gramotnev (2007)                   |                      | AWB     | CES-D                  | -18      | 18                 | 716  | -0.02 |
| Lee & Gramotnev (2007)                   |                      | CWB     | Self-constructed scale | -18      | 18                 | 716  | 0.04  |
| Lucas, Clark, Georgellis & Diener (2004) |                      | CWB     | Single item            | -0.5     | 6                  | 4066 | -0.29 |
| Lucas, Clark, Georgellis & Diener (2004) |                      | CWB     | Single item            | -0.5     | 18                 | 3289 | 0.02  |
| Lucas, Clark, Georgellis & Diener (2004) |                      | CWB     | Single item            | -0.5     | 30                 | 2817 | 0.01  |
| Lucas, Clark, Georgellis & Diener (2004) |                      | CWB     | Single item            | -0.5     | 42                 | 2391 | 0.00  |
| Lucas, Clark, Georgellis & Diener (2004) |                      | CWB     | Single item            | -0.5     | 54                 | 1955 | 0.04  |
| Lucas, Clark, Georgellis & Diener (2004) |                      | CWB     | Single item            | -0.5     | 66                 | 1548 | 0.03  |
| Lucas, Clark, Georgellis & Diener (2004) |                      | CWB     | Single item            | -0.5     | 78                 | 1220 | 0.04  |
| Lucas, Clark, Georgellis & Diener (2004) |                      | CWB     | Single item            | -0.5     | 90                 | 942  | 0.06  |
| Lucas, Clark, Georgellis & Diener (2004) |                      | CWB     | Single item            | -0.5     | 102                | 670  | 0.13  |

| <b>Publication</b>           | <b>Group</b> | <b>AWB/CWB</b> | <b>Scale</b>                              | <b>Time lag</b> | <b>Months since event</b> | <b><i>N</i></b> | <b><i>d</i></b> |
|------------------------------|--------------|----------------|-------------------------------------------|-----------------|---------------------------|-----------------|-----------------|
| Prause & Dooley (2001)       |              | AWB            | CES-D                                     | -12             | 12                        | 54              | -0.35           |
| Shamir (1986)                |              | AWB            | DACL                                      | -3.5            | 3.5                       | 65              | 0.66            |
| Shamir (1986)                |              | AWB            | DACL                                      | -3.5            | 3.5                       | 14              | -0.43           |
| Winefield & Tiggemann (1990) |              | AWB            | Depressive Affect Scale (Rosenberg, 1965) | -6              | 6                         | 30              | -0.19           |
| Winefield & Tiggemann (1990) |              | AWB            | Self-constructed scale                    | -6              | 6                         | 30              | -0.25           |

*Notes.* AWB = affective well-being. CWB = cognitive well-being. Time lag = time between baseline and event in months. *N* = sample size. *d* = bias-corrected standardized mean change. The abbreviations for the scales are listed in Table 5.



Table 15. Post-hoc effect sizes for unemployment.

| Publication                  | Group | AWB/CWB | Scale                       | Time lag | Months since event | <i>N</i> | <i>d</i> |
|------------------------------|-------|---------|-----------------------------|----------|--------------------|----------|----------|
| Lai & Chan (2002)            |       | AWB     | GHQ                         | 33       | 41                 | 48       | -0.48    |
| Lai & Chan (2002)            |       | CWB     | SWLS                        | 33       | 41                 | 48       | -0.65    |
| Price, Choi & Vinokur (2002) |       | AWB     | HCL,<br>depression subscale | 1.5      | 7.5                | 667      | 0.00     |
| Price, Choi & Vinokur (2002) |       | AWB     | HCL,<br>depression subscale | 1.5      | 25.5               | 616      | 0.00     |
| Shamir (1986)                |       | AWB     | DACL                        | 5.5      | 12                 | 49       | -0.13    |
| Wanberg (1995)               |       | CWB     | SWLS                        | 2        | 11                 | 29       | -0.30    |

*Notes.* AWB = affective well-being. CWB = cognitive well-being. Time lag = time between baseline and event in months. *N* = sample size. *d* = bias-corrected standardized mean change. The abbreviations for the scales are listed in Table 5.

Table 16. Prospective effect sizes for reemployment.

| Publication                            | Group              | AWB/CWB | Scale                                                                       | Time lag | Months since event | <i>N</i> | <i>d</i> |
|----------------------------------------|--------------------|---------|-----------------------------------------------------------------------------|----------|--------------------|----------|----------|
| Ali & Avison (1997)                    | married mothers    | AWB     | CES-D                                                                       | -9       | 9                  | 46       | 0.16     |
| Ali & Avison (1997)                    | single mothers     | AWB     | CES-D                                                                       | -9       | 9                  | 43       | 0.04     |
| Ginexi, Howe & Caplan, (2000)          |                    | AWB     | CES-D                                                                       | -2       | 2                  | 55       | 0.74     |
| Ginexi, Howe & Caplan, (2000)          |                    | AWB     | CES-D                                                                       | -3.5     | 3.5                | 42       | 0.41     |
| Isaksson (1990)                        |                    | AWB     | GHQ                                                                         | -6       | 6                  | 23       | 0.50     |
| Jackson, Stafford, Banks & Warr (1983) | first cohort early | AWB     | GHQ                                                                         | -4       | 4                  | 30       | 0.76     |
| Jackson, Stafford, Banks & Warr (1983) | first cohort late  | AWB     | GHQ                                                                         | -7.5     | 7.5                | 19       | 0.50     |
| Jackson, Stafford, Banks & Warr (1983) | second cohort      | AWB     | GHQ                                                                         | -8       | 8                  | 19       | 0.87     |
| Nordenmark (1999)                      | instrumental job   | AWB     | GHQ                                                                         | -10.5    | 10.5               | 134      | 0.34     |
| Nordenmark (1999)                      | self-employed      | AWB     | GHQ                                                                         | -10.5    | 10.5               | 41       | 0.26     |
| Nordenmark (1999)                      | stimulating job    | AWB     | GHQ                                                                         | -10.5    | 10.5               | 280      | 0.51     |
| Prause & Dooley (2001)                 | underemployed      | AWB     | CES-D                                                                       | -12      | 12                 | 293      | 0.10     |
| Prause & Dooley (2001)                 | unemployed         | AWB     | CES-D                                                                       | -12      | 12                 | 208      | 0.25     |
| Wiese (2010)                           |                    | CWB     | German Version of the Relationship Assessment Scale (Sander & Böcker, 1993) | -0.5     | 1                  | 251      | -0.27    |
| Wiese (2010)                           |                    | CWB     | German Version of the Relationship Assessment Scale (Sander & Böcker, 1993) | -0.5     | 2.25               | 224      | -0.09    |
| Wiese (2010)                           |                    | CWB     | German Version of the Relationship Assessment Scale (Sander & Böcker, 1993) | -0.5     | 7                  | 197      | -0.06    |
| Wiese (2010)                           |                    | AWB     | PANAS                                                                       | -0.5     | 1                  | 266      | -0.02    |

| <b>Publication</b>           | <b>Group</b> | <b>AWB/CWB</b> | <b>Scale</b>                              | <b>Time lag</b> | <b>Months since event</b> | <b><i>N</i></b> | <b><i>d</i></b> |
|------------------------------|--------------|----------------|-------------------------------------------|-----------------|---------------------------|-----------------|-----------------|
| Wiese (2010)                 |              | AWB            | PANAS                                     | -0.5            | 1                         | 266             | 0.04            |
| Wiese (2010)                 |              | AWB            | PANAS                                     | -0.5            | 2.25                      | 238             | 0.12            |
| Wiese (2010)                 |              | AWB            | PANAS                                     | -0.5            | 2.25                      | 238             | 0.10            |
| Wiese (2010)                 |              | AWB            | PANAS                                     | -0.5            | 7                         | 206             | 0.08            |
| Wiese (2010)                 |              | AWB            | PANAS                                     | -0.5            | 7                         | 205             | 0.14            |
| Wiese (2010)                 |              | CWB            | SWLS                                      | -0.5            | 1                         | 266             | -0.13           |
| Wiese (2010)                 |              | CWB            | SWLS                                      | -0.5            | 2.25                      | 234             | -0.15           |
| Wiese (2010)                 |              | CWB            | SWLS                                      | -0.5            | 7                         | 208             | 0.00            |
| Winefield & Tiggemann (1990) |              | AWB            | Depressive Affect Scale (Rosenberg, 1965) | -6              | 6                         | 40              | 0.20            |
| Winefield & Tiggemann (1990) |              | AWB            | Self-constructed scale                    | -6              | 6                         | 40              | 0.13            |

*Notes.* AWB = affective well-being. CWB = cognitive well-being. Time lag = time between baseline and event in months. *N* = sample size. *d* = bias-corrected standardized mean change. The abbreviations for the scales are listed in Table 5.

Table 17. Post-hoc effect sizes for reemployment.

| Publication                               | Group | AWB/CWB | Scale                                                                   | Time lag | Months since event | <i>N</i> | <i>d</i> |
|-------------------------------------------|-------|---------|-------------------------------------------------------------------------|----------|--------------------|----------|----------|
| Boswell, Shipp, Payne & Culbertson (2009) |       | CWB     | Michigan Organizational Assessment Questionnaire (Cammann et al., 1979) | 3        | 6                  | 88       | -0.26    |
| Boswell, Shipp, Payne & Culbertson (2009) |       | CWB     | Michigan Organizational Assessment Questionnaire (Cammann et al., 1979) | 3        | 12                 | 88       | -0.20    |

*Notes.* AWB = affective well-being. CWB = cognitive well-being. Time lag = time between baseline and event in months. *N* = sample size. *d* = bias-corrected standardized mean change. The abbreviations for the scales are listed in Table 5.

Table 18. Prospective effect sizes for retirement.

| Publication                           | Group | AWB/CWB | Scale                                                   | Time lag | Months since event | <i>N</i> | <i>d</i> |
|---------------------------------------|-------|---------|---------------------------------------------------------|----------|--------------------|----------|----------|
| De Vaus, Wells, Kendig & Quine (2007) |       | CWB     | DAS                                                     | -0.25    | 12                 | 265      | 0.07     |
| De Vaus, Wells, Kendig & Quine (2007) |       | CWB     | DAS                                                     | -0.25    | 36                 | 263      | 0.06     |
| De Vaus, Wells, Kendig & Quine (2007) |       | CWB     | Life Satisfaction (Campbell, Converse, & Rodgers, 1976) | -0.25    | 12                 | 345      | -0.26    |
| De Vaus, Wells, Kendig & Quine (2007) |       | CWB     | Life Satisfaction (Campbell, Converse, & Rodgers, 1976) | -0.25    | 36                 | 348      | -0.27    |
| De Vaus, Wells, Kendig & Quine (2007) |       | AWB     | Scale by Lawton et al. (1992)                           | -0.25    | 12                 | 345      | 0.05     |
| De Vaus, Wells, Kendig & Quine (2007) |       | AWB     | Scale by Lawton et al. (1992)                           | -0.25    | 12                 | 345      | 0.53     |
| De Vaus, Wells, Kendig & Quine (2007) |       | AWB     | Scale by Lawton et al. (1992)                           | -0.25    | 36                 | 348      | -0.01    |
| De Vaus, Wells, Kendig & Quine (2007) |       | AWB     | Scale by Lawton et al. (1992)                           | -0.25    | 36                 | 348      | 0.38     |
| Gall, Evans & Howard (1997)           |       | CWB     | Single Item                                             | -3       | 12                 | 117      | 0.15     |
| Isaksson & Johansson (2000)           |       | AWB     | GHQ-12                                                  | -9       | 9                  | 226      | 0.06     |
| Kim & Moen (2002)                     |       | AWB     | CES-D                                                   | -9       | 15                 | 78       | 0.11     |
| Kim & Moen (2002)                     |       | CWB     | Single Item                                             | -9       | 15                 | 75       | -1.47    |
| Mayring (2000)                        |       | CWB     | Scale by Buchmüller et al. (1996)                       | -6       | 6                  | 463      | -0.02    |
| Mayring (2000)                        |       | AWB     | Scale by Buchmüller et al. (1996)                       | -6       | 6                  | 462      | -0.03    |
| Mayring (2000)                        |       | CWB     | Scale by Buchmüller et al. (1996)                       | -6       | 18                 | 462      | -0.07    |
| Mayring (2000)                        |       | AWB     | Scale by Buchmüller et al. (1996)                       | -6       | 18                 | 461      | -0.06    |
| Nordenmark (1999)                     |       | AWB     | GHQ                                                     | -10.5    | 10.5               | 32       | 0.22     |
| Nuttman-Shwartz (2004)                |       | AWB     | MHI, subscale                                           | -6       | 12                 | 52       | 0.15     |

| Publication                                                   | Group    | AWB/CWB   | Scale                                              | Time lag | Months since event | <i>N</i> | <i>d</i> |
|---------------------------------------------------------------|----------|-----------|----------------------------------------------------|----------|--------------------|----------|----------|
| Nuttman-Shwartz (2004)                                        |          | AWB       | MHI, subscale                                      | -6       | 12                 | 52       | 0.28     |
| Pinquart & Schindler (2007)                                   |          | CWB       | Single Item                                        | -6       | 6                  | 1456     | 0.07     |
| Pinquart & Schindler (2007)                                   |          | CWB       | Single Item                                        | -6       | 18                 | 1456     | 0.06     |
| Pinquart & Schindler (2007)                                   |          | CWB       | Single Item                                        | -6       | 30                 | 1456     | 0.06     |
| Pinquart & Schindler (2007)                                   |          | CWB       | Single Item                                        | -6       | 42                 | 1456     | 0.03     |
| Pinquart & Schindler (2007)                                   |          | CWB       | Single Item                                        | -6       | 54                 | 1456     | 0.02     |
| Pinquart & Schindler (2007)                                   |          | CWB       | Single Item                                        | -6       | 66                 | 1456     | 0.09     |
| Poitrenaud, Vallery-Masson, Costagliola, Darcet & Lion (1983) |          | CWB       | Life Satisfaction Index-A (Neugarten et al., 1961) | -18      | 18                 | 105      | 0.24     |
| Reitzes, Mutran & Fernandez (1996)                            |          | AWB       | CES-D                                              | -12      | 12                 | 291      | 0.23     |
| Richardson & Kilty (1991)                                     |          | (missing) | Self-constructed scale                             | -1       | 6                  | 242      | -0.25    |
| Richardson & Kilty (1991)                                     |          | (missing) | Self-constructed scale                             | -1       | 12                 | 222      | -0.16    |
| Wang (2007)                                                   | sample 1 | AWB       | CES-D, short version                               | -12      | 12                 | 994      | 0.52     |
| Wang (2007)                                                   | sample 1 | AWB       | CES-D, short version                               | -12      | 36                 | 905      | 0.47     |
| Wang (2007)                                                   | sample 1 | AWB       | CES-D, short version                               | -12      | 48                 | 881      | 0.60     |
| Wang (2007)                                                   | sample 2 | AWB       | CES-D, short version                               | -12      | 12                 | 1066     | 0.07     |
| Wang (2007)                                                   | sample 2 | AWB       | CES-D, short version                               | -12      | 36                 | 958      | 0.19     |
| Wang (2007)                                                   | sample 2 | AWB       | CES-D, short version                               | -12      | 48                 | 923      | 0.21     |

*Notes.* AWB = affective well-being. CWB = cognitive well-being. Time lag = time between baseline and event in months. *N* = sample size. *d* = bias-corrected standardized mean change. The abbreviations for the scales are listed in Table 5.

*Table 19.* Post-hoc effect sizes for retirement.

| <b>Publication</b>                          | <b>Group</b> | <b>AWB/CWB</b> | <b>Scale</b> | <b>Time lag</b> | <b>Months since event</b> | <b><i>N</i></b> | <b><i>d</i></b> |
|---------------------------------------------|--------------|----------------|--------------|-----------------|---------------------------|-----------------|-----------------|
| Stephan, Bilard, Ninot & Delignières (2003) |              | AWB            | GHQ          | 2               | 5                         | 16              | 0.46            |
| Stephan, Bilard, Ninot & Delignières (2003) |              | AWB            | GHQ          | 2               | 8                         | 16              | 0.59            |
| Stephan, Bilard, Ninot & Delignières (2003) |              | AWB            | GHQ          | 2               | 11.5                      | 16              | 1.24            |

*Notes.* AWB = affective well-being. CWB = cognitive well-being. Time lag = time between baseline and event in months. *N* = sample size. *d* = bias-corrected standardized mean change. The abbreviations for the scales are listed in Table 5.

Table 20. Prospective effect sizes for relocation/migration.

| Publication                                                  | Event      | AWB/CWB | Scale                                                | Time lag | Months since event | <i>N</i> | <i>d</i> |
|--------------------------------------------------------------|------------|---------|------------------------------------------------------|----------|--------------------|----------|----------|
| Bardi & Ryff (2007)                                          | Relocation | AWB     | CES-D                                                | -6       | 2                  | 294      | 0.26     |
| Bardi & Ryff (2007)                                          | Relocation | AWB     | CES-D                                                | -6       | 8                  | 286      | 0.42     |
| Bardi & Ryff (2007)                                          | Relocation | AWB     | CES-D                                                | -6       | 15                 | 298      | 0.30     |
| Lee & Gramotnev (2007)                                       | Relocation | AWB     | CES-D                                                | -18      | 18                 | 1262     | 0.14     |
| Lee & Gramotnev (2007)                                       | Relocation | AWB     | CES-D                                                | -18      | 18                 | 172      | 0.18     |
| Lee & Gramotnev (2007)                                       | Relocation | CWB     | Self-constructed scale                               | -18      | 18                 | 1262     | 0.48     |
| Lee & Gramotnev (2007)                                       | Relocation | CWB     | Self-constructed scale                               | -18      | 18                 | 172      | 0.35     |
| Munton & West (1995)                                         | Relocation | AWB     | GHQ                                                  | -1       | 3                  | 119      | 0.19     |
| Munton & West (1995)                                         | Relocation | AWB     | GHQ                                                  | -1       | 6                  | 121      | 0.38     |
| Rossen & Knafl (2007)                                        | Relocation | AWB     | Geriatric Depression Scale (GDS; Brink et al., 1982) | -1       | 3                  | 30       | 0.11     |
| Savicki, Downing-Burnette, Heller, Binder & Suntinger (2004) | Migration  | CWB     | SWLS                                                 | -1       | 1                  | 17       | 0.22     |
| Savicki, Downing-Burnette, Heller, Binder & Suntinger (2004) | Migration  | CWB     | SWLS                                                 | -1       | 2                  | 17       | 0.35     |
| Savicki, Downing-Burnette, Heller, Binder & Suntinger (2004) | Migration  | CWB     | SWLS                                                 | -1       | 3                  | 17       | 0.55     |

Notes. AWB = affective well-being. CWB = cognitive well-being. Time lag = time between baseline and event in months. *N* = sample size. *d* = bias-corrected standardized mean change. The abbreviations for the scales are listed in Table 5.



Table 21. Post-hoc effect sizes for relocation/migration.

| Publication                                  | Event     | Group       | AWB/<br>CWB | Scale                                                                                    | Time<br>lag | Months<br>since<br>event | <i>N</i> | <i>d</i> |
|----------------------------------------------|-----------|-------------|-------------|------------------------------------------------------------------------------------------|-------------|--------------------------|----------|----------|
| Aroian & Norris<br>(2002)                    | Migration |             | AWB         | SCL-90-R,<br>depression<br>subscale                                                      | 20.8        | 44.8                     | 468      | 0.05     |
| Bikos et al. (2007)                          | Migration |             | CWB         | KMS                                                                                      | 0.5         | 3                        | 29       | 0.05     |
| Bikos et al. (2007)                          | Migration |             | CWB         | KMS                                                                                      | 0.5         | 6                        | 29       | 0.06     |
| Bikos et al. (2007)                          | Migration |             | CWB         | KMS                                                                                      | 0.5         | 9                        | 29       | 0.12     |
| Bikos et al. (2007)                          | Migration |             | CWB         | KMS                                                                                      | 0.5         | 12                       | 29       | 0.05     |
| Chou (2007)                                  | Migration |             | AWB         | GHQ                                                                                      | 5           | 17                       | 359      | -0.15    |
| Schmitt-Rodermund<br>& Silbereisen<br>(2002) | Migration | Experienced | AWB         | Self-Image<br>Questionnaire<br>for<br>Young<br>Adolescents<br>(Petersen et<br>al., 1984) | 31          | 37                       | 109      | 0.04     |
| Schmitt-Rodermund<br>& Silbereisen<br>(2002) | Migration | Experienced | AWB         | Self-Image<br>Questionnaire<br>for<br>Young<br>Adolescents<br>(Petersen et<br>al., 1984) | 31          | 43                       | 108      | 0.13     |
| Schmitt-Rodermund<br>& Silbereisen<br>(2002) | Migration | Newcomers   | AWB         | Self-Image<br>Questionnaire<br>for<br>Young<br>Adolescents<br>(Petersen et<br>al., 1984) | 16          | 22                       | 105      | 0.02     |
| Schmitt-Rodermund<br>& Silbereisen<br>(2002) | Migration | Newcomers   | AWB         | Self-Image<br>Questionnaire<br>for<br>Young<br>Adolescents<br>(Petersen et<br>al., 1984) | 16          | 28                       | 103      | 0.16     |

Notes. AWB = affective well-being. CWB = cognitive well-being. Time lag = time between baseline and event in months. *N* = sample size. *d* = bias-corrected standardized mean change. The abbreviations for the scales are listed in Table 5.

Figure 1. Prospective adaptation curves for cognitive well-being. For divorce and relocation/migration, this curve is estimated using cognitive and affective well-being effect sizes.

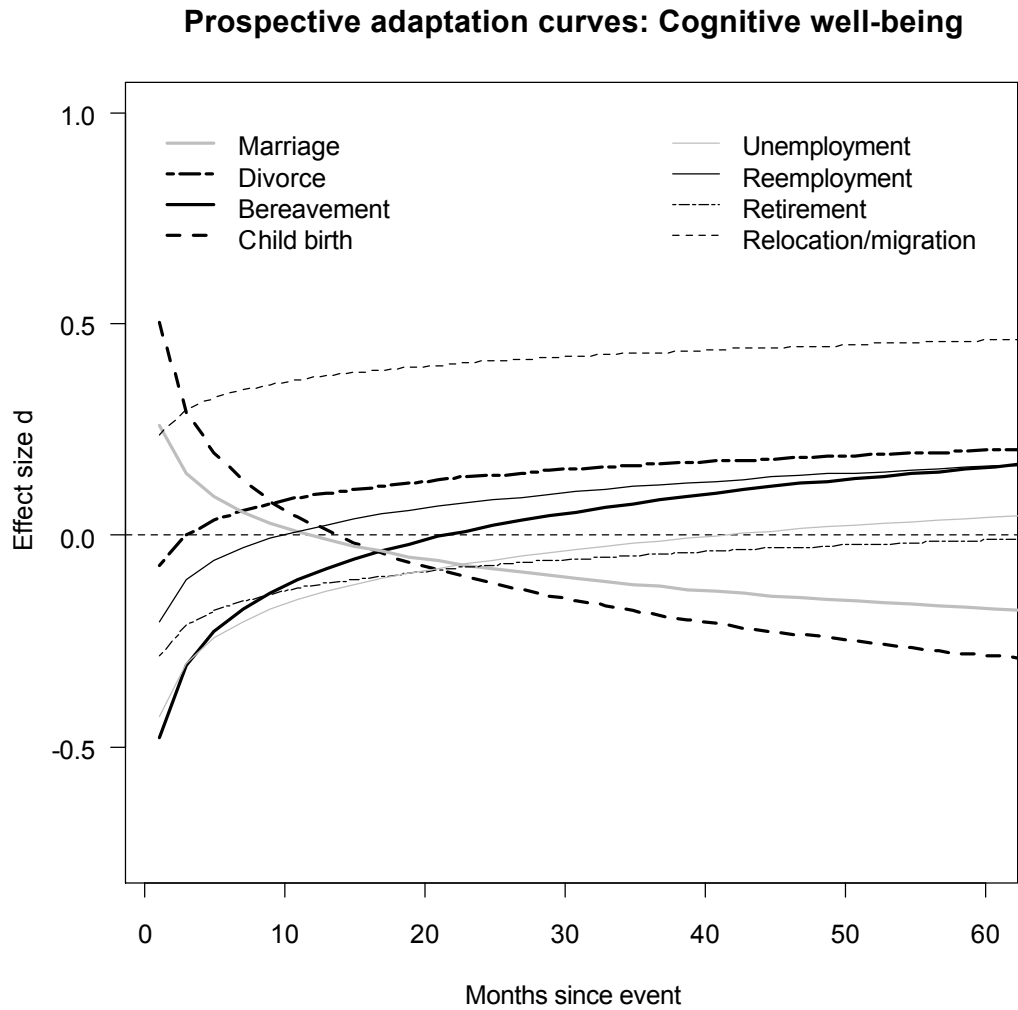

Figure 2. Prospective adaptation curves for affective well-being.

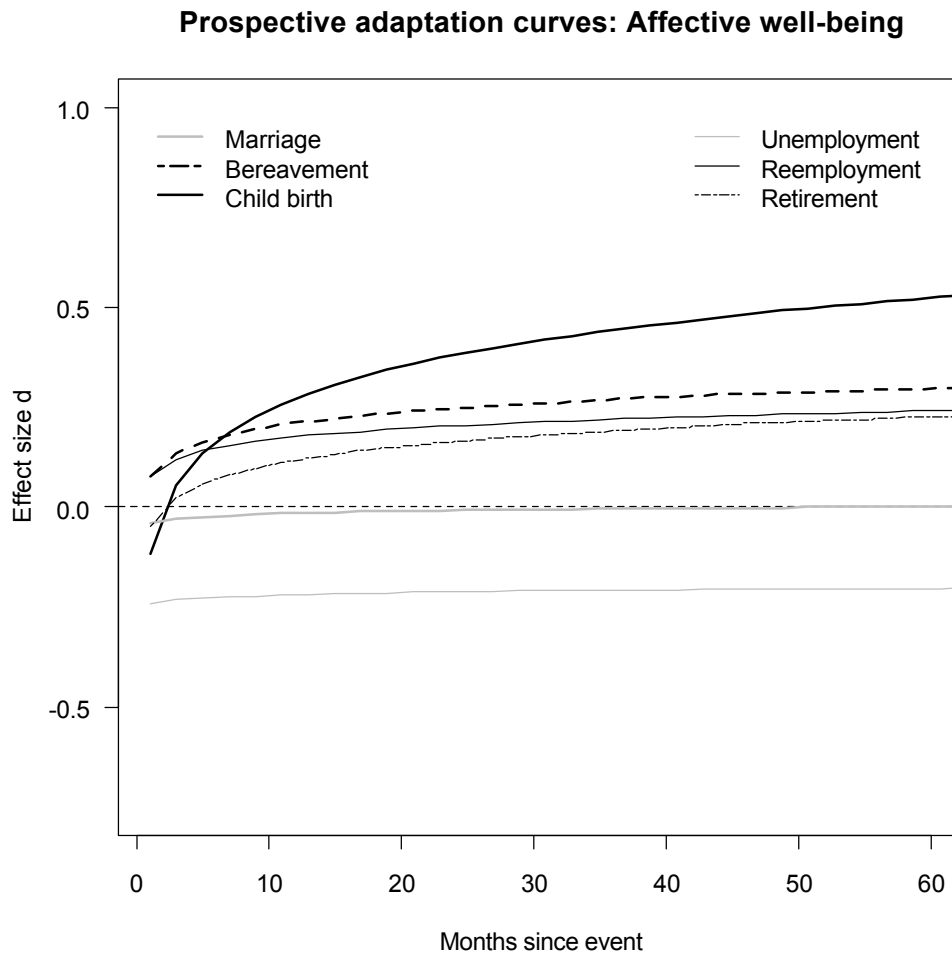

**Reference list for cited scales**

- Barnett, R., Marshall, N., Raudenbush, S., & Brennan, R. (1993). Gender and the relationship between job experiences and psychological distress: A study of dual-earner couples. *Journal of Personality and Social Psychology*, 64(5), 794-806.
- Berkman, P. (1971). Life stress and psychological well-being: A replication of Langner's analysis in the midtown Manhattan study. *Journal of Health and Social Behavior*, 12(1), 35-45.
- Bradburn, N. (1969). *The structure of psychological well-being*. Oxford England: Aldine.
- Braiker, H. B., & Kelley, H. H. (1979). Conflict in the development of close relationships. In R. L. Burgess & T. L. Huston (Eds.), *Social exchange in developing relationships* (pp. 135-168). New York: Academic.
- Brink, T., et al. (1982). Screening tests for geriatric depression. *Clinical Gerontologist: The Journal of Aging and Mental Health*, 1(1), 37-43.
- Brorsson, B., Ifver, J., & Hays, R. (1993). The Swedish Health-Related Quality of Life Survey (SWED-QUAL). *Quality of Life Research: An International Journal of Quality of Life Aspects of Treatment, Care & Rehabilitation*, 2(1), 33-45.
- Buchmüller, R., et al. (1996) *Vor dem Ruhestand. Eine psychologische Untersuchung zum Erleben der Zeit vor der Pensionierung*. [Before retirement: A psychological study on the experience of time before retirement.] Bern: Huber.
- Cammann, C., Fichman, M., Jenkins, D., & Klesh, J. (1979). *The Michigan Organizational Assessment Questionnaire*. Unpublished manuscript.
- Campbell, A., Converse, P., & Rodgers, W. (1976). *The quality of American life: Perceptions, evaluations, and satisfactions*. New York, NY US: Russell Sage Foundation.
- Cox, J., Holden, J., & Sagovsky, R. (1987). Detection of postnatal depression: Development of the 10-item Edinburgh Postnatal Depression Scale. *British Journal of Psychiatry*, 150, 782-786.

- Crown, S., & Crisp, A. (1966). A short clinical diagnostic self-rating scale for psychoneurotic patients: The Middlesex Hospital Questionnaire (M.H.Q.). *British Journal of Psychiatry*, *112*(490), 917-923.
- Derogatis, L. R. (1986). The psychosocial adjustment to illness scale (PAIS). *Journal of Psychosomatic Research*, *30*(1), 77-91.
- Derogatis, L. R., Lipman, R. S., Rickels, K., Uhlenhuth, E. H., & Covi, L. (1974). The Hopkins Symptom Checklist (HSCL): A self-report symptom inventory. *Behavioral Science*, *19*(1), 1-15.
- Derogatis, L., & Melisaratos, N. (1983). The Brief Symptom Inventory: An introductory report. *Psychological Medicine: A Journal of Research in Psychiatry and the Allied Sciences*, *13*(3), 595-605.
- Derogatis, L.R. & Cleary, P.A. (1977). Confirmation of the dimensional structure of the SCL-90: a study in construct validation. *Journal of Clinical Psychology*, *33*, 981-989.
- Diener, E., Emmons, R., Larsen, R., & Griffin, S. (1985). The Satisfaction With Life Scale. *Journal of Personality Assessment*, *49*(1), 71-75.
- Dupuy, H. J. (1984). The Psychological General Well-Being (PGWB) index. In N. K. Wenger, M. E. Mattson, C. D. Furberg, & J. Elinson (Eds.), *Assessment of Quality of Life in Clinical Trials of Cardiovascular Therapies* (pp. 170–183). New York: Le Jacq.
- Endicott, J., & Spitzer, R. L. (1977). A diagnostic interview. The schedule for affective disorders and schizophrenia. *Archives of General Psychiatry*, *35*(7), 837-844.
- Fowers, B., & Olson, D. (1993). ENRICH Marital Satisfaction Scale: A brief research and clinical tool. *Journal of Family Psychology*, *7*(2), 176-185.
- Goldbeck, L. (1998). Die familiäre Bewältigung einer Krebserkrankung im Kindes- und Jugendalter. Möglichkeiten der standardisierten Erfassung mit Selbstbeurteilungsverfahren:

- Ergebnisse einer empirischen Vorstudie. [Families coping with cancer during childhood and adolescence: Practicability of standardized self-assessment methods]. *Praxis der Kinderpsychologie und Kinderpsychiatrie*, 47(8), 552-573.
- Goldberg, D. (1992). *General Health Questionnaire (GHQ-12)*. Windsor: NFER-NELSON.
- Grob, A., Lüthi, R., Kaiser, F. G., & Flammer, A. (1991). Berner Fragebogen zum Wohlbefinden Jugendlicher (BFW). [The Bern Subjective Well-Being Questionnaire for Adolescents (BFW)]. *Diagnostica*, 37(1), 66-75.
- Hahlweg, K. (1996). *Fragebogen zur Partnerschaftsdiagnostik (FPD)*. [Questionnaire for relationship diagnostics.] Göttingen: Hogrefe.
- Henrich, G., & Herschbach, P. (2000). Questions on Life Satisfaction (FLZ-M): A short questionnaire for assessing subjective quality of life. *European Journal of Psychological Assessment*, 16(3), 150-159.
- Huston, T. L., McHale, S. M., & Crouter, A. C. (1986). When the honeymoon's over: Changes in the marriage relationship over the first year. In R. Gilmore & S. Duck (Eds.), *The emerging field of personal relationships* (pp. 109-132). Hillsdale, NJ: Erlbaum.
- Kovacs, M. (1985). The Children's Depression Inventory (CDI). *Psychopharmacology Bulletin*, 21(4), 995-998.
- Lange, A. (1983). *Handleiding Interactionele Probleem Oplossings Vragenlijst (IPOV) [Manual for Interactional Problem-Solving Inventory (IPSI)]*. Deventer: Van Loghum Slaterus.
- Lawton, M., Kleban, M., Dean, J., & Rajagopal, D. (1992). The factorial generality of brief positive and negative affect measures. *Journals of Gerontology*, 47(4), 228-237.
- Levitt, M. J., Coffman, S., Guacci-Franco, N., & Loveless, S. C. (1994). Attachment relations and life transitions: An expectancy model. In M. B. Sperling, & W. H. Berman (Eds.),

- Attachment in adults: Clinical and developmental perspectives* (pp. 232–255). New York: Guilford.
- Liang, J. (1984). Dimensions of the Life Satisfaction Index A: A structural formulation. *Journal of Gerontology, 39*(5), 613-622.
- Little, T. D., Ryan, R., & Wanner, B. (1997). *The Inventory of Felt Energy and Emotion in Life: I FEEL (ACCD Technical Report No. 4)*. Berlin: Max Planck Institute.
- Locke, H., & Wallace, K. (1959). Short marital-adjustment and prediction tests: Their reliability and validity. *Marriage & Family Living, 21*(3), 251-255.
- Lovibond, P., & Lovibond, S. (1995). The structure of negative emotional states: Comparison of the Depression Anxiety Stress Scales (DASS) with the Beck Depression and Anxiety Inventories. *Behaviour Research and Therapy, 33*(3), 335-343.
- Lubin, B. (1965). *Adjective Checklists for Measurement of Depression*. *Archives of General Psychiatry, 12*(1), 57-62.
- McNair, D. M., Lorr, M., & Droppleman, L. (1992). Profile of mood states. *Test Critiques, 1*, 522-529.
- Neugarten, B., Havighurst, R., & Tobin, S. (1961). The measurement of life satisfaction. *Journal of Gerontology, 16*, 134-143.
- Norton, R. (1983). Measuring marital quality: A critical look at the dependent variable. *Journal of Marriage & the Family, 45*(1), 141-151.
- Osgood, C. E., Suci, G. J., & Tannenbaum, P. H. (1957). *The measurement of meaning*. Oxford: University of Illinois Press.
- Petersen, A. (1984). A self-image questionnaire for young adolescents (SIQYA): Reliability and validity studies. *Journal of Youth and Adolescence, 13*(2), 93-111.

- Pierce, G., Sarason, I., & Sarason, B. (1991). General and relationship-based perceptions of social support: Are two constructs better than one? *Journal of Personality and Social Psychology*, *61*(6), 1028-1039.
- Power, M., & Kuyken, W. (1996). A draft paper on behalf of the WHOQOL Group. The World Health Organization Quality of Life Assessment (WHOQOL): Development and general psychometric properties. *Social Science & Medicine*, *46*(12), 1569-1585.
- Quinn, R.P. & Staines, G.L. (1979). *The 1977 Quality of Employment Survey*. Ann Arbor, Michigan: Institute for Social Research, University of Michigan.
- Radloff, L. S. (1977). The CES-D Scale: A self-report depression scale for research in the general population. *Applied Psychological Measurement*, *1*(3), 385-401.
- Ravens-Sieberer, U., et al. (2005). KIDSCREEN-52 quality-of-life measure for children and adolescents. *Expert Review of Pharmacoeconomics and Outcomes Research*, *5*(3), 353-364.
- Rosenberg, M. (1965). *Society and the adolescent self-image*. Princeton, NJ: Princeton University Press.
- Ruble, D. N., Fleming, A. S., Stangor, C., Brooks-Gunn, J., Fitzmaurice, G., & Deutsch, F. (1990). Transition to motherhood and the self: measurement, stability, and change. *Journal of Personality and Social Psychology*, *58*(3), 450-463.
- Sabatelli, R.M. (1984). The marital comparison level index: A measure for assessing outcomes relative to expectations. *Journal of Marriage and the Family*, *46*(3), 651-662.
- Sander, J., & Böcker, S. (1993). Die deutsche Form der Relationship Assessment Scale (RAS): Eine kurze Skala zur Messung der Zufriedenheit in einer Partnerschaft. [The German version of the Relationship Assessment Scale (RAS): A short scale for measuring satisfaction in a dyadic relationship.] *Diagnostica*, *39*(1), 55-62.



- Schumm, W., Paff-Bergen, L., Hatch, R., & Obiorah, F. (1986). Concurrent and discriminant validity of the Kansas Marital Satisfaction Scale. *Journal of Marriage & the Family*, 48(2), 381-387.
- Snyder, D. (1979). Multidimensional assessment of marital satisfaction. *Journal of Marriage & the Family*, 41(4), 813-823.
- Spanier, G. (1976). Measuring dyadic adjustment: New scales for assessing the quality of marriage and similar dyads. *Journal of Marriage & the Family*, 38(1), 15-28.
- Tucker, M., Ogle, S., Davison, J., & Eilenberg, M. (1986). Development of a brief screening test for depression in the elderly. *Journal of Clinical & Experimental Gerontology*, 8(3-4), 173-190.
- Veit, C. T., & Ware, J. E. Jr. (1983). The structure of psychological distress and well-being in general populations. *Journal of Consulting and Clinical Psychology*, 51(5), 730-42.
- Ware, J., & Sherbourne, C. (1992). The MOS 36-item short-form health survey (SF-36): I. Conceptual framework and item selection. *Medical Care*, 30(6), 473-483.
- Warr, P., Cook, J., & Wall, T. (1979). Scales for the measurement of some work attitudes and aspects of psychological well-being. *Journal of Occupational Psychology*, 52(2), 129-148.
- Watson, D., Clark, L. A., & Tellegen, A. (1988). Development and validation of brief measures of positive and negative affect: The PANAS scales. *Journal of Personality and Social Psychology*, 54(6), 1063-1070.
- Weiss, D., Dawis, R., & England, G. (1967). Manual for the Minnesota Satisfaction Questionnaire. *Minnesota Studies in Vocational Rehabilitation*, 22, 120.
- Wood, V. W., Wylie, M. L., Sheafor, B. (1969) An analysis of a short, self-report measure of life satisfaction: Correlation with rater judgments. *Journal of Gerontology*, 24(4), 465-469.
- Zerssen, D. (1976). *Paranoid-Depressivitäts-Skala sowie Depressivitäts-Skala. Manual.* [Paranoid depression scale and depression scale. Manual.] Weinheim: Beltz Test.

Zigmond, A. S., & Snaith, R. P. (1983). The Hospital Anxiety and Depression Scale. *Acta Psychiatrica Scandinavica*, 67(6), 361-370.

Zimmerman, M., & Coryell, W. (1987). The Inventory to Diagnose Depression (IDD): A self-report scale to diagnose major depressive disorder. *Journal of Consulting and Clinical Psychology*, 55(1), 55-59.

Zuckerman, M., & Lubin, B. (1965). Normative data for the Multiple Affect Adjective Check List. *Psychological Reports*, 16(2).
